# Supplementary material for: Metal-catalyzed rearrangements of 3-allenyl 3-hydroxyindolin-2-ones in the presence of halogenated reagents
Source: Royal Society of Chemistry journal article supplement (doi:10.1039/c2ob27359d), 2012-12-15

## Supporting Information for the Paper

### Metal-catalyzed rearrangements of 3-allenyl 3-hydroxyindolin-2-ones in the presence of halogenated reagents

Benito Alcaide,<sup>\*1</sup> Pedro Almendros,<sup>\*2</sup> Amparo Luna,<sup>1</sup> and Natividad Prieto<sup>1,2</sup>

<sup>1</sup>*Grupo de Lactamas y Heterociclos Bioactivos, Departamento de Química Orgánica I, Unidad Asociada al CSIC, Facultad de Química, Universidad Complutense de Madrid, 28040-Madrid, Spain*

<sup>2</sup>*Instituto de Química Orgánica General, CSIC, Juan de la Cierva 3, 28006-Madrid, Spain*

E-mail: alcaideb@quim.ucm.es; Palmendros@iqog.csic.es

### Table of Contents

<sup>1</sup>H NMR and <sup>13</sup>C NMR Spectra

S2–S26

09LC18FA

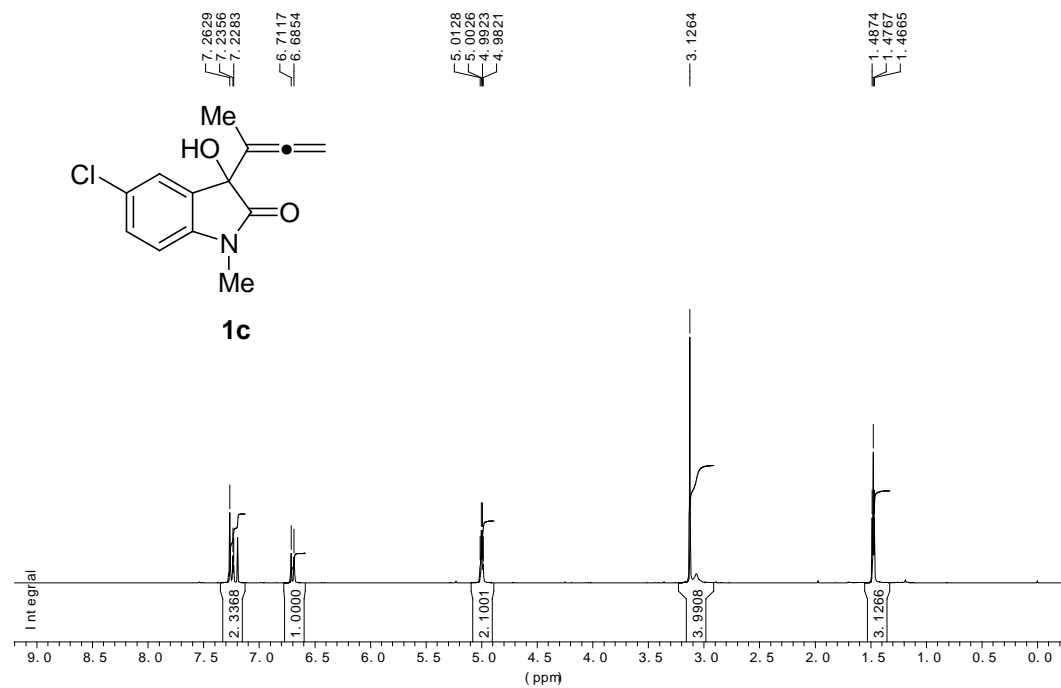

09LC18FA

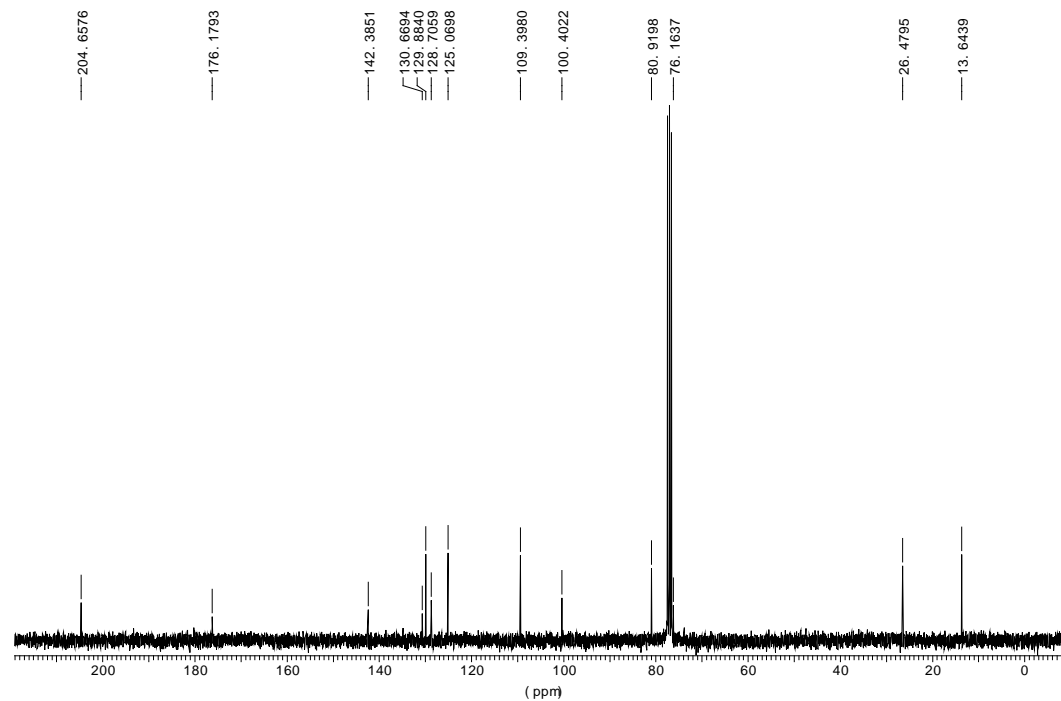

091C826

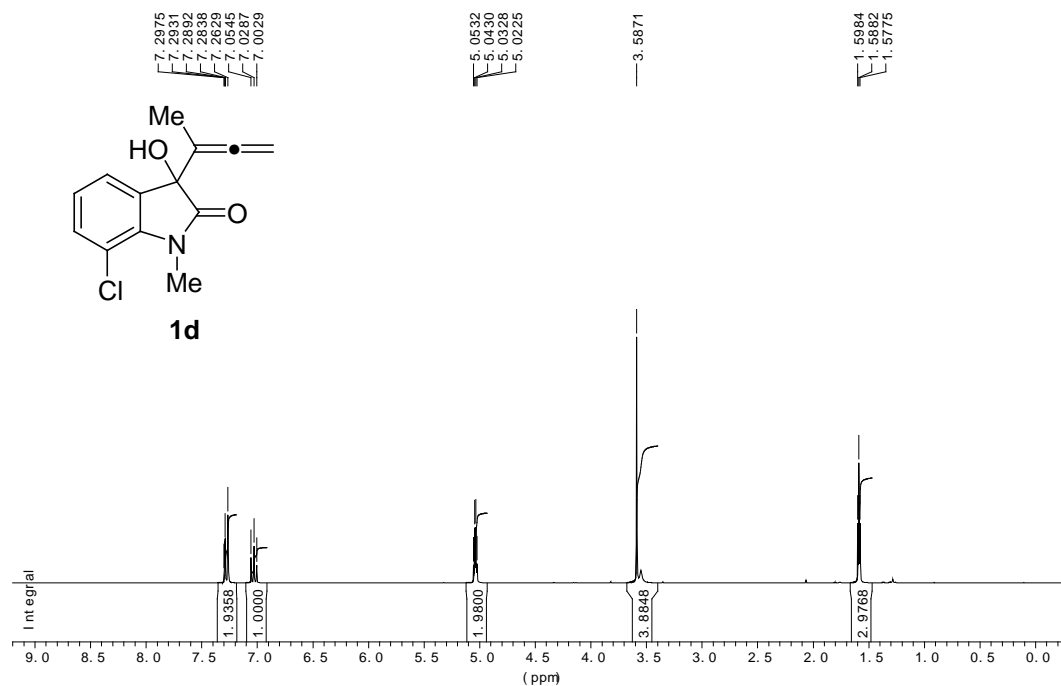

091C826

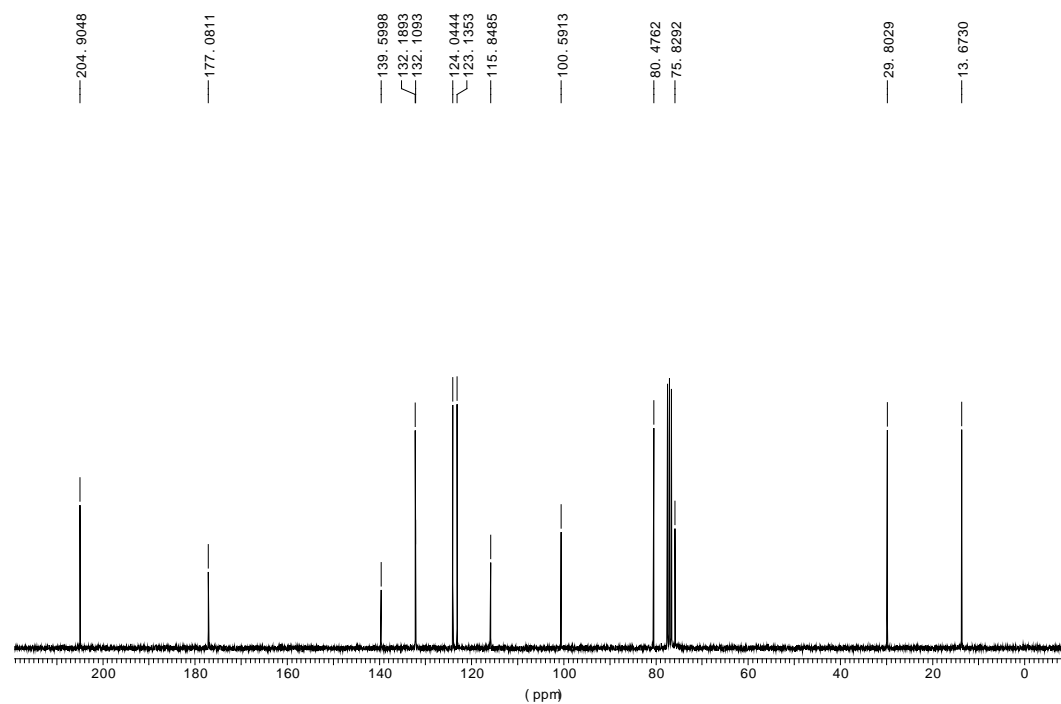

DEL0360

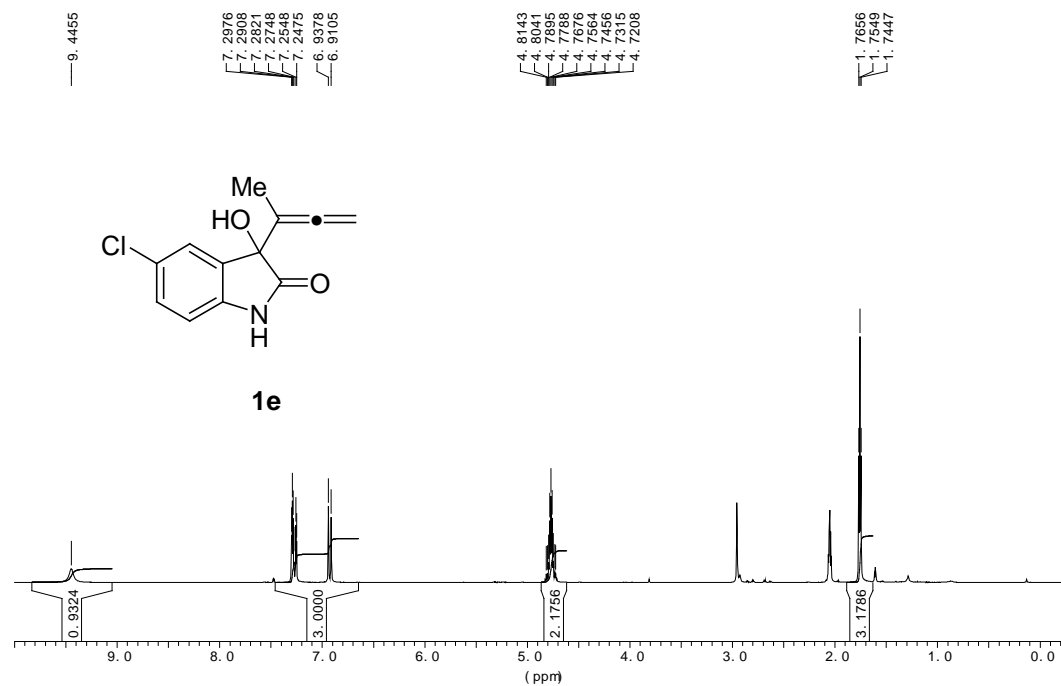

DEL0360

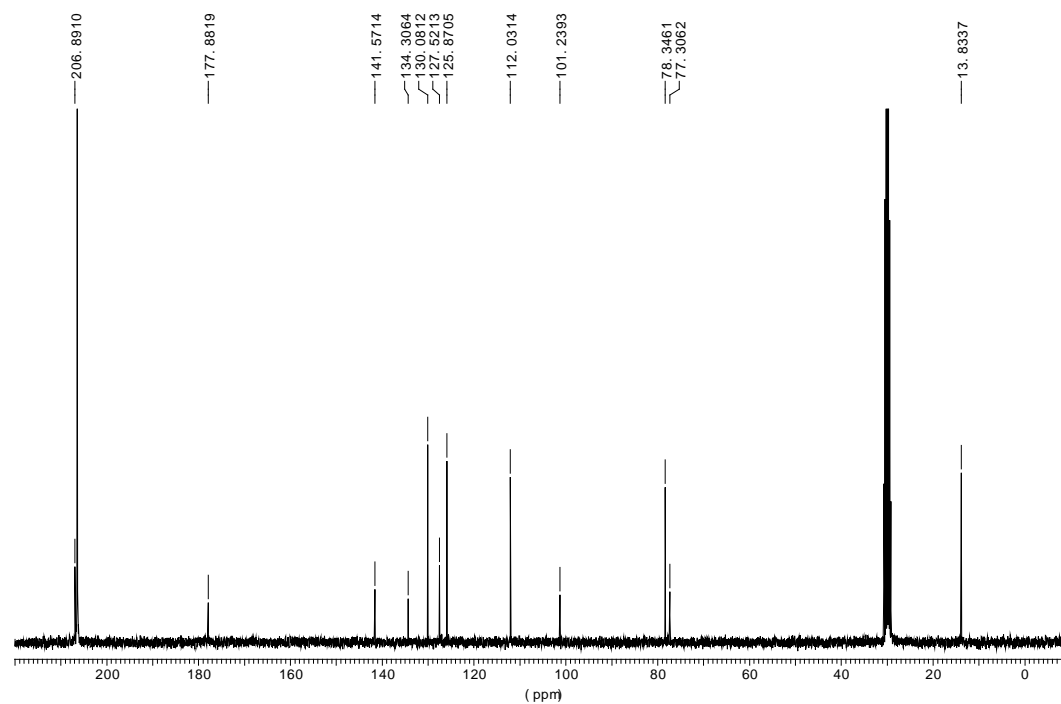

0ELC361

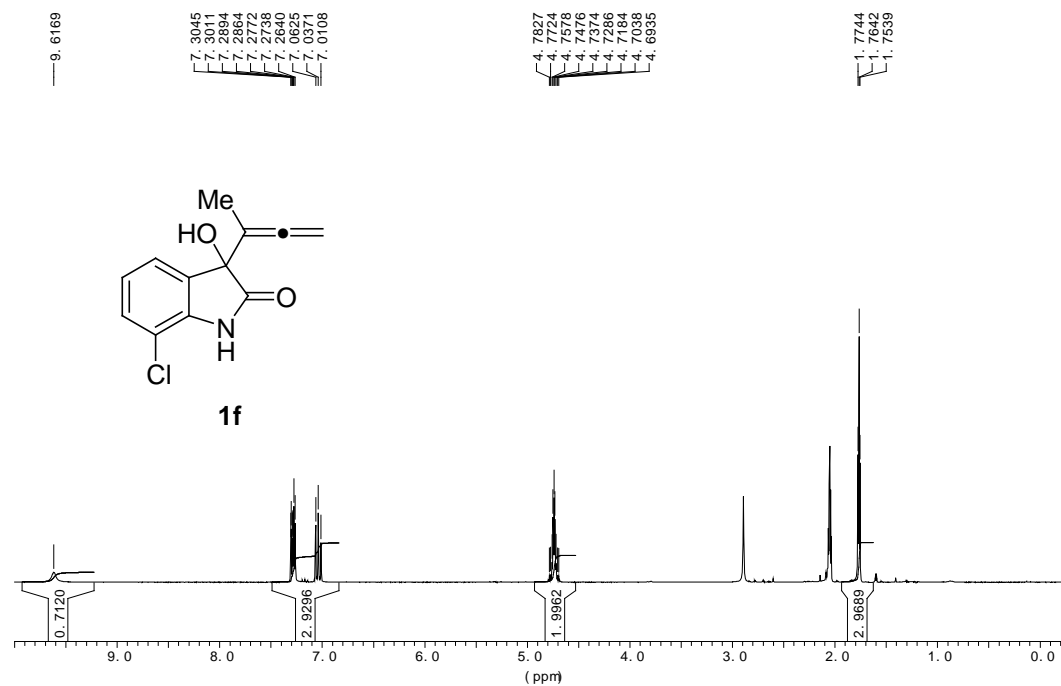

0ELC361

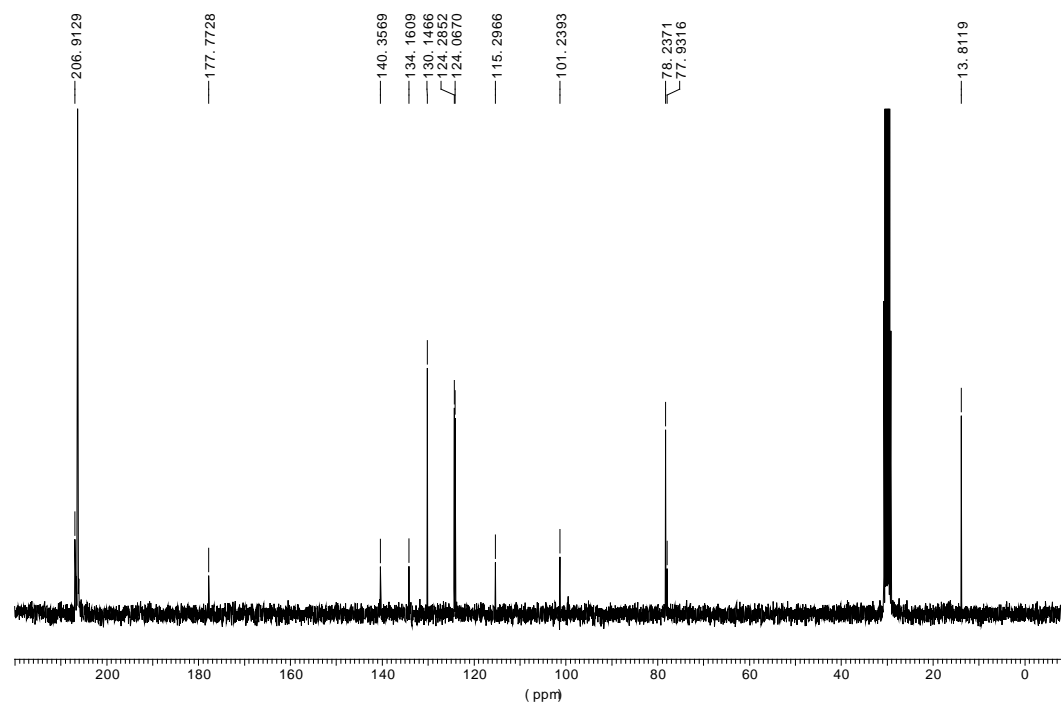

a) - 637DMSO

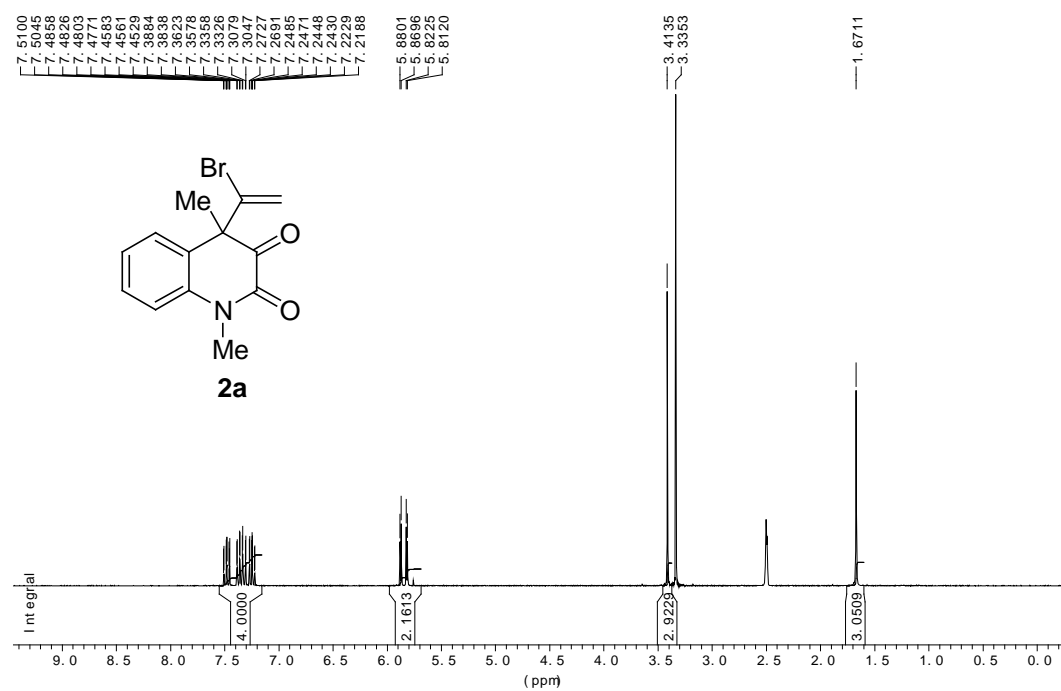

a) - 637C

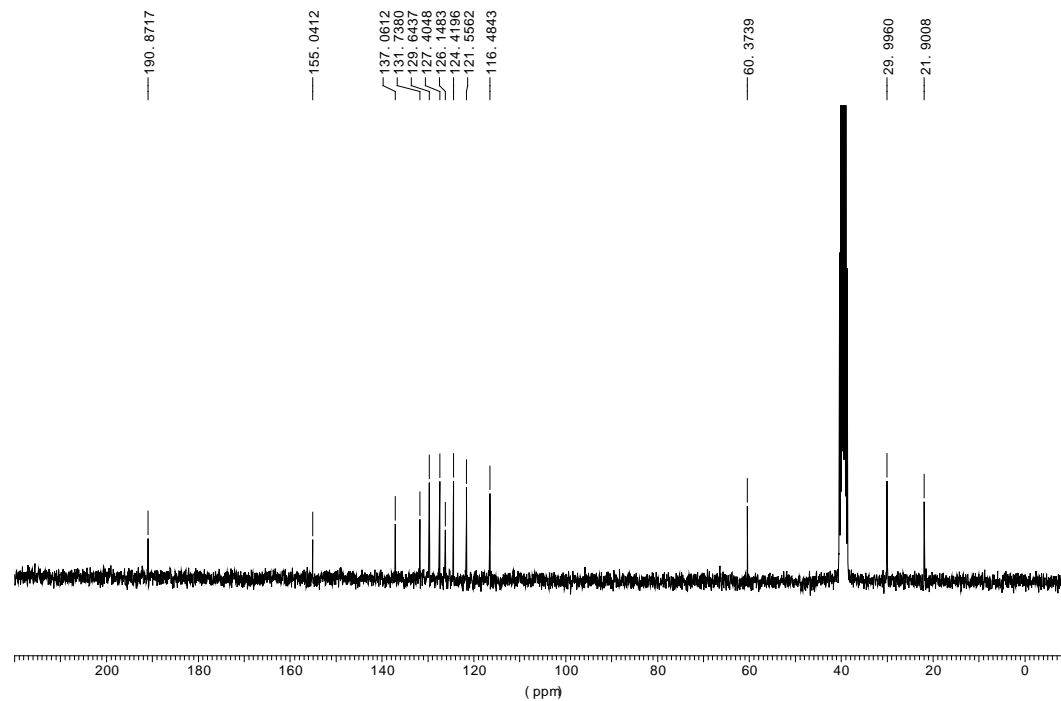

a) - 787080

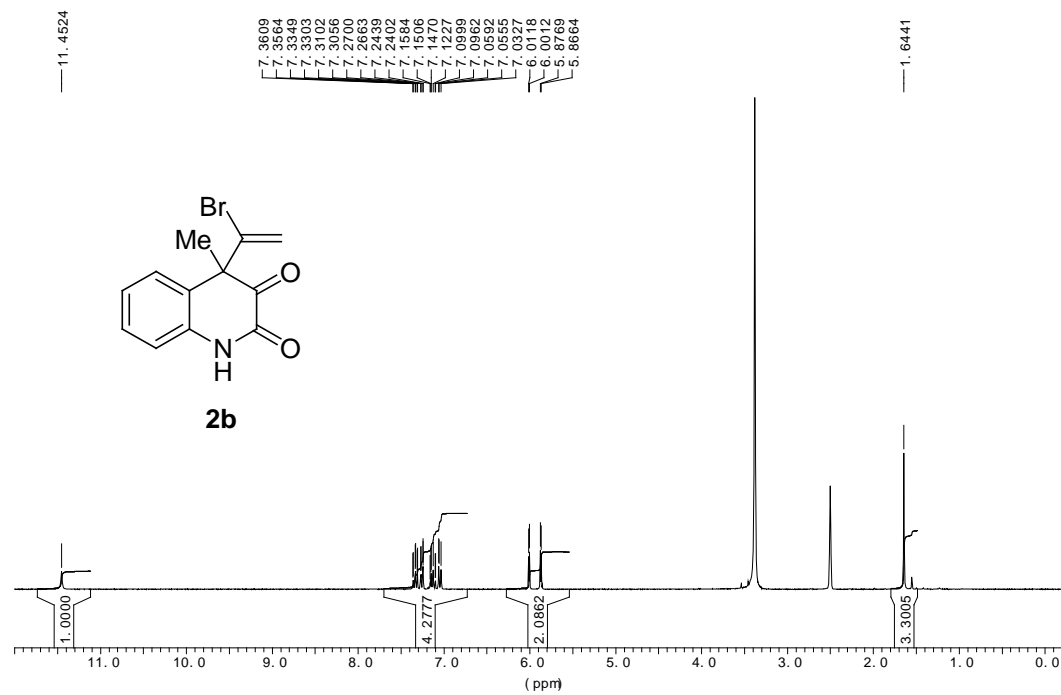

b) - 787080

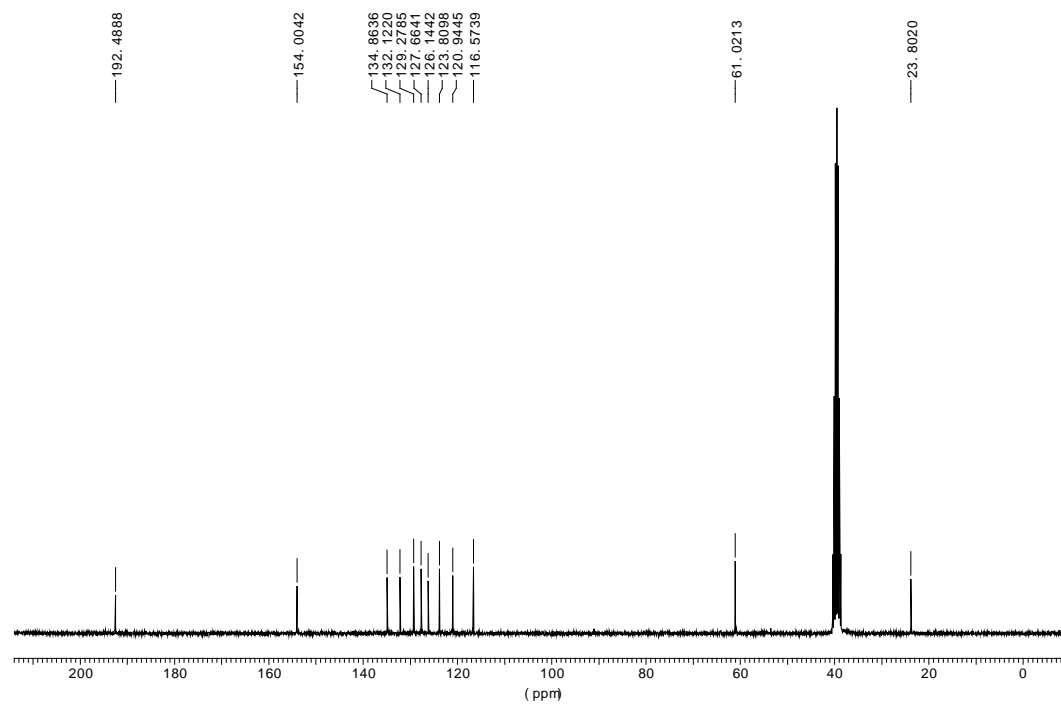

08LC19FB

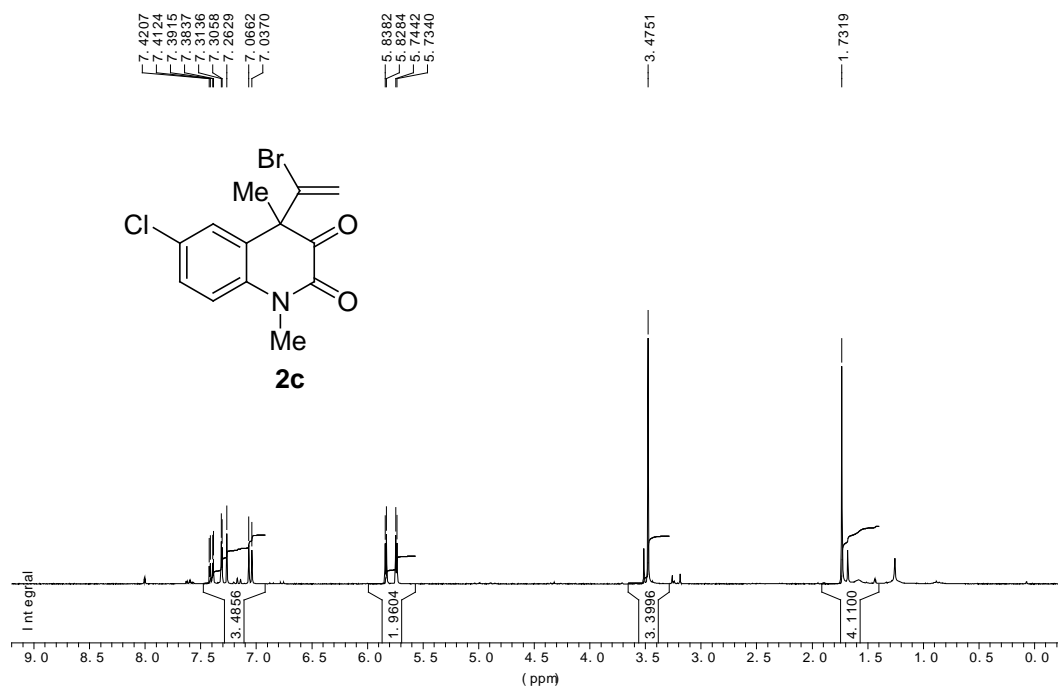

08LC19FB

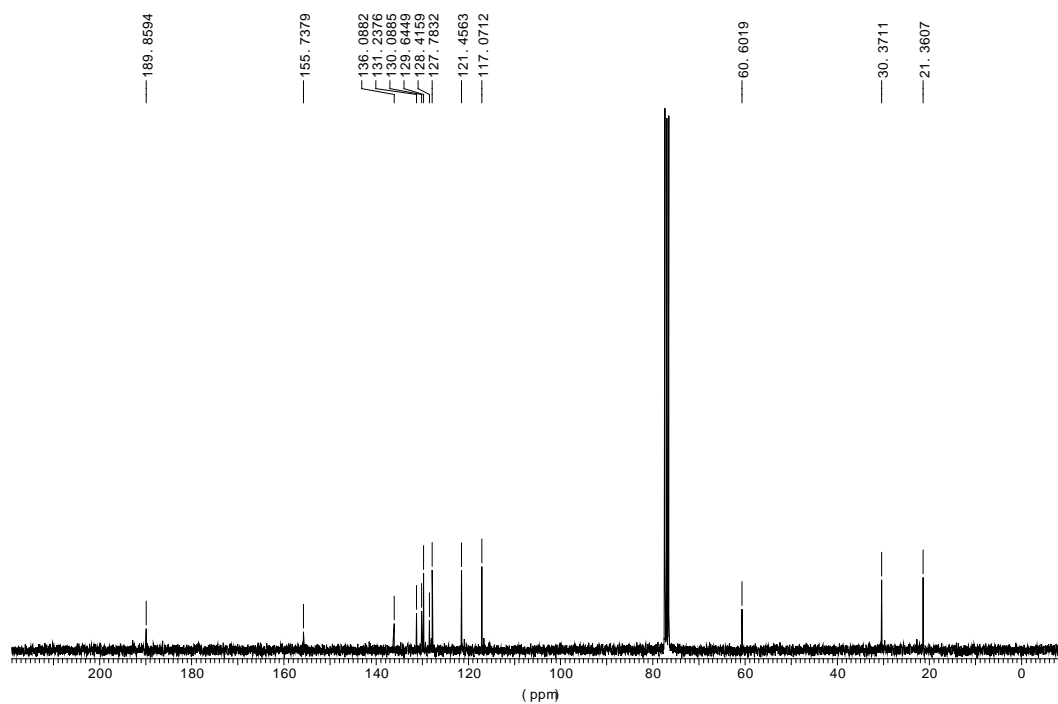



091C829FB

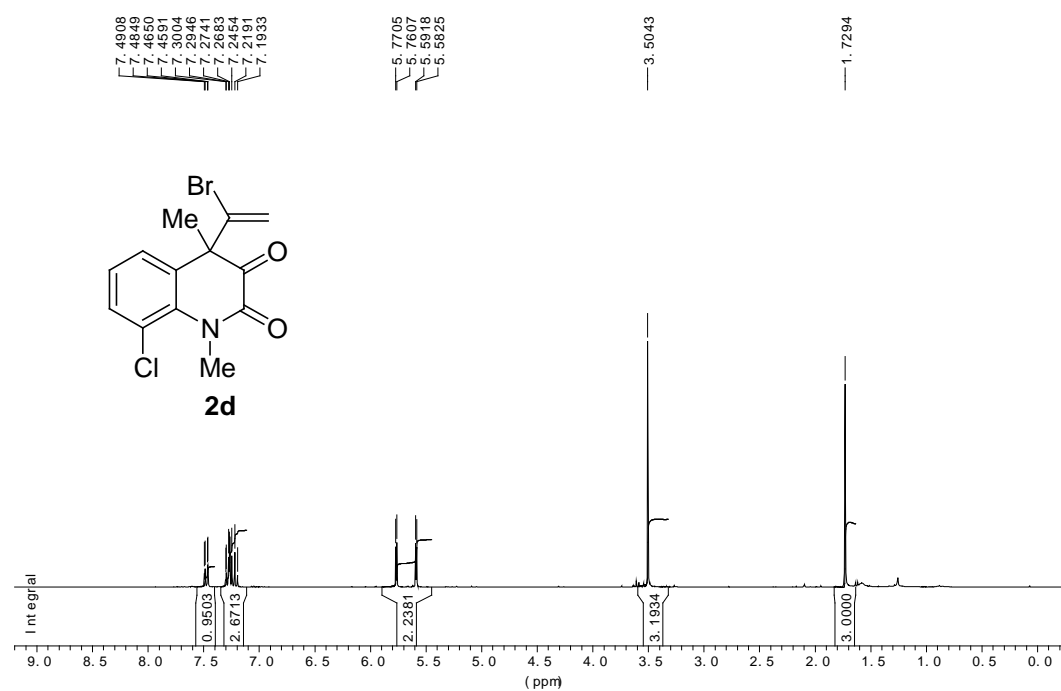

091C829C

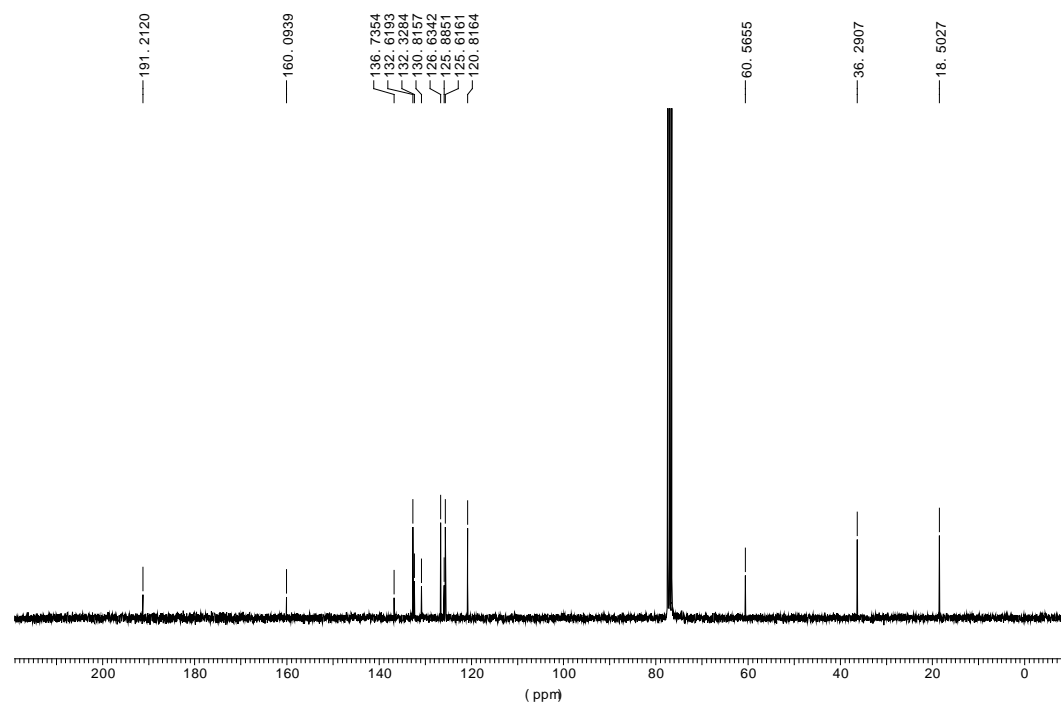

a - 832 c

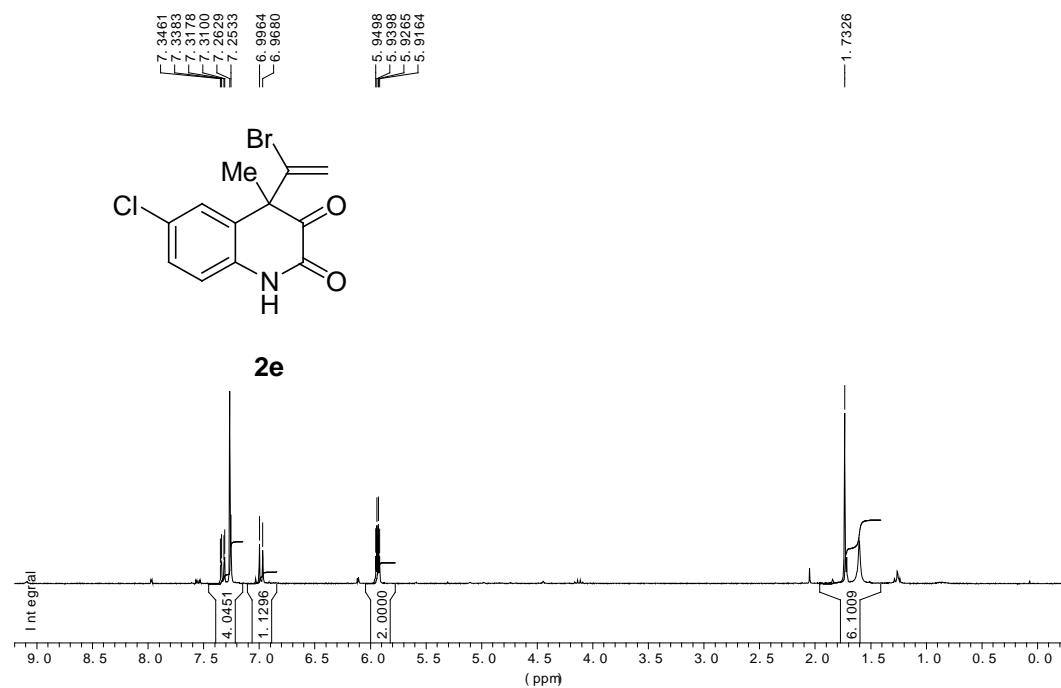

b - 832 c

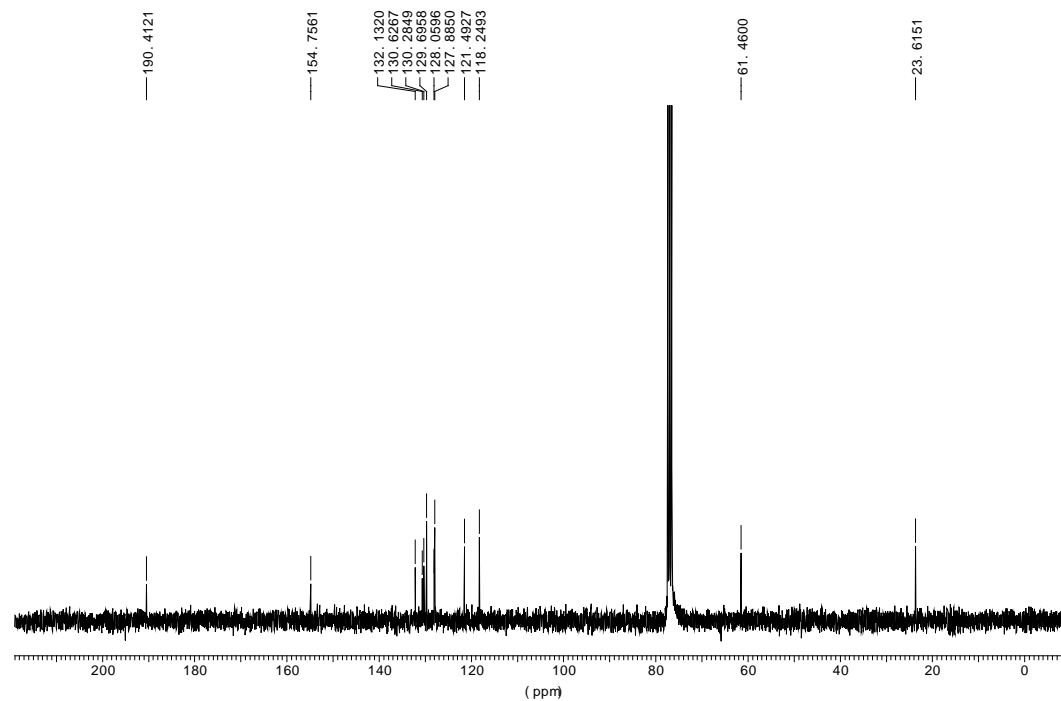

DEL0266FB

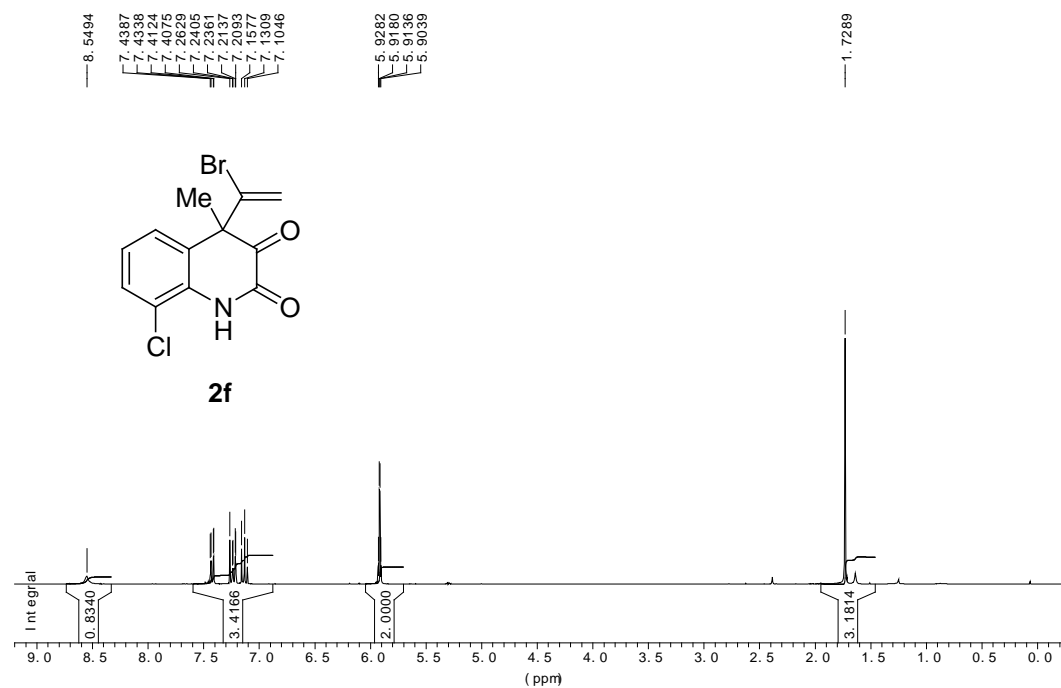

DEL0266FB

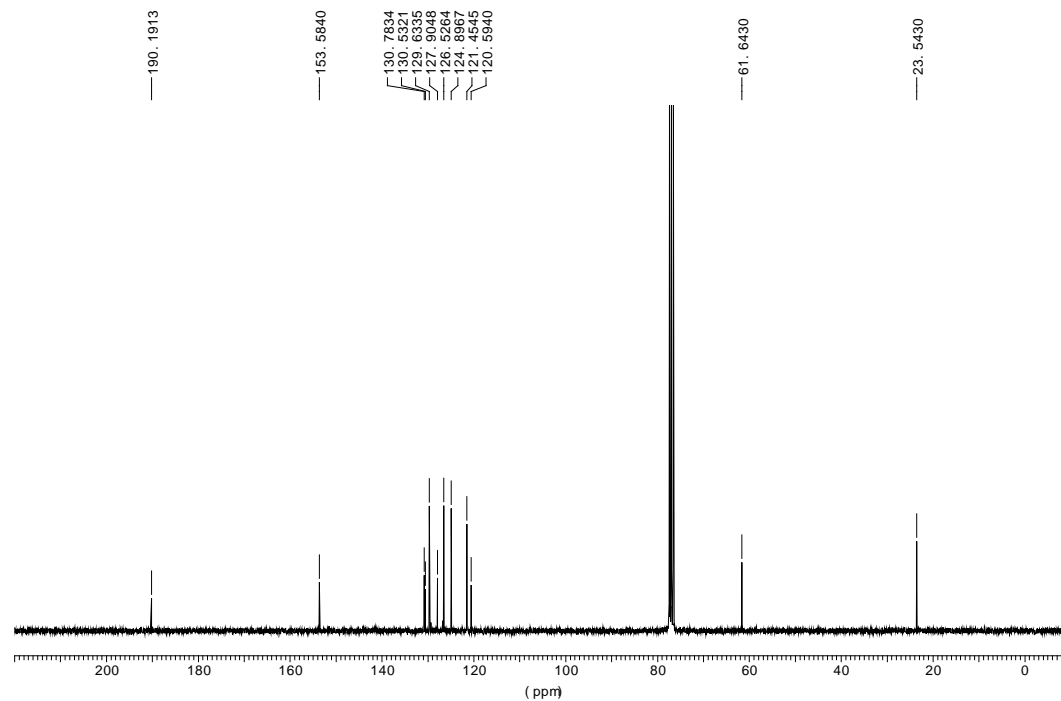

081C803

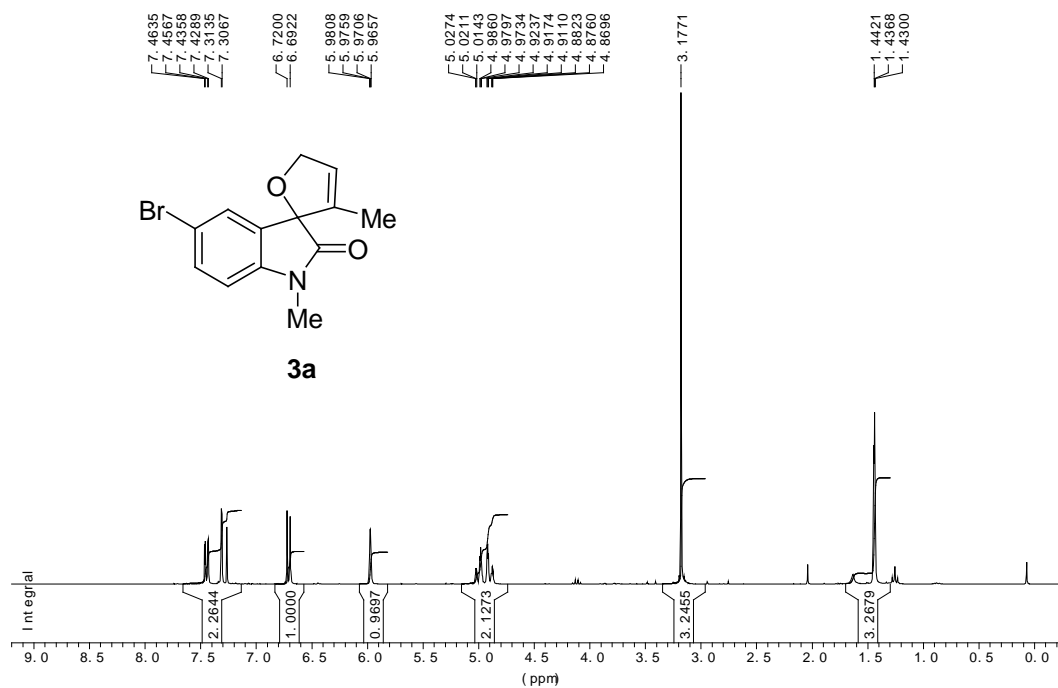

081C803P

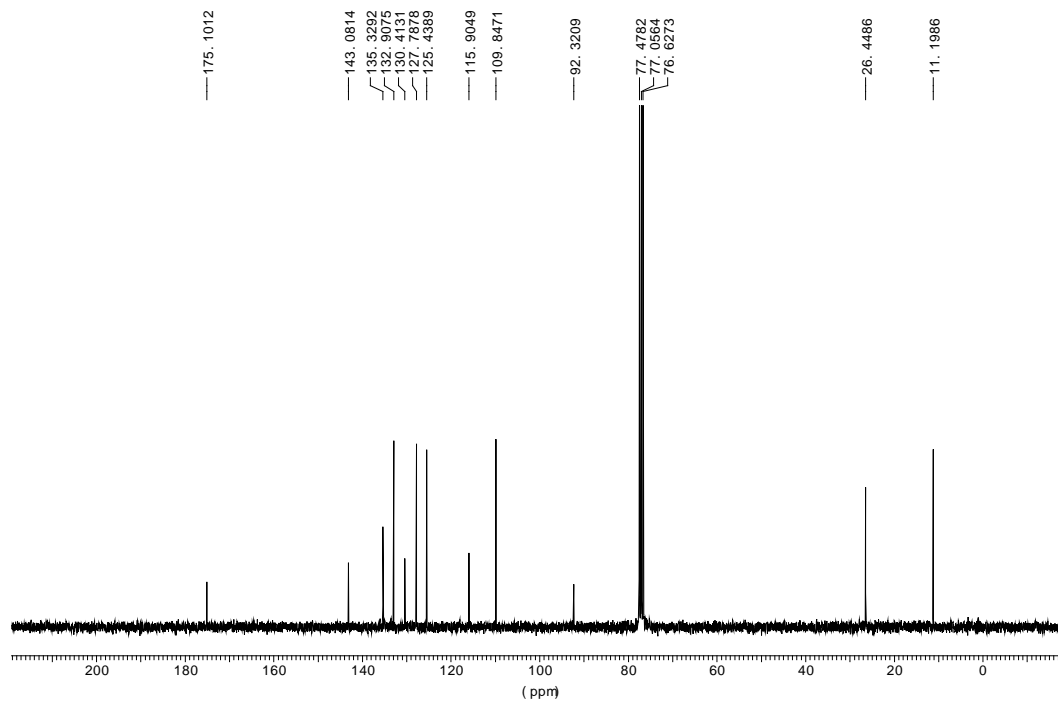

a - 828 a

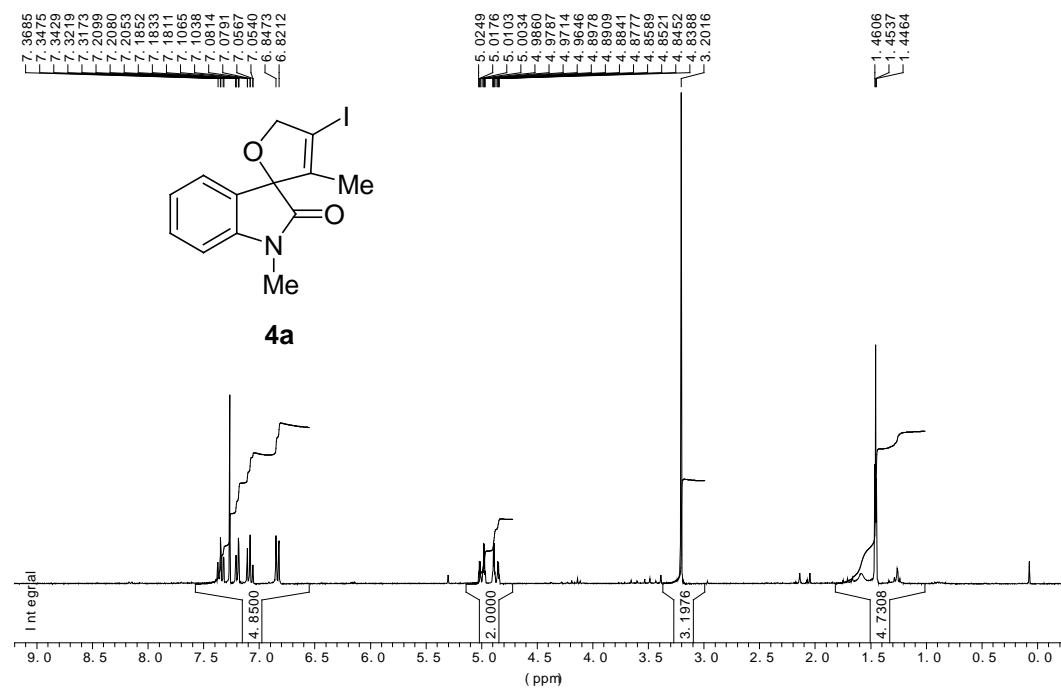

09LC28FA

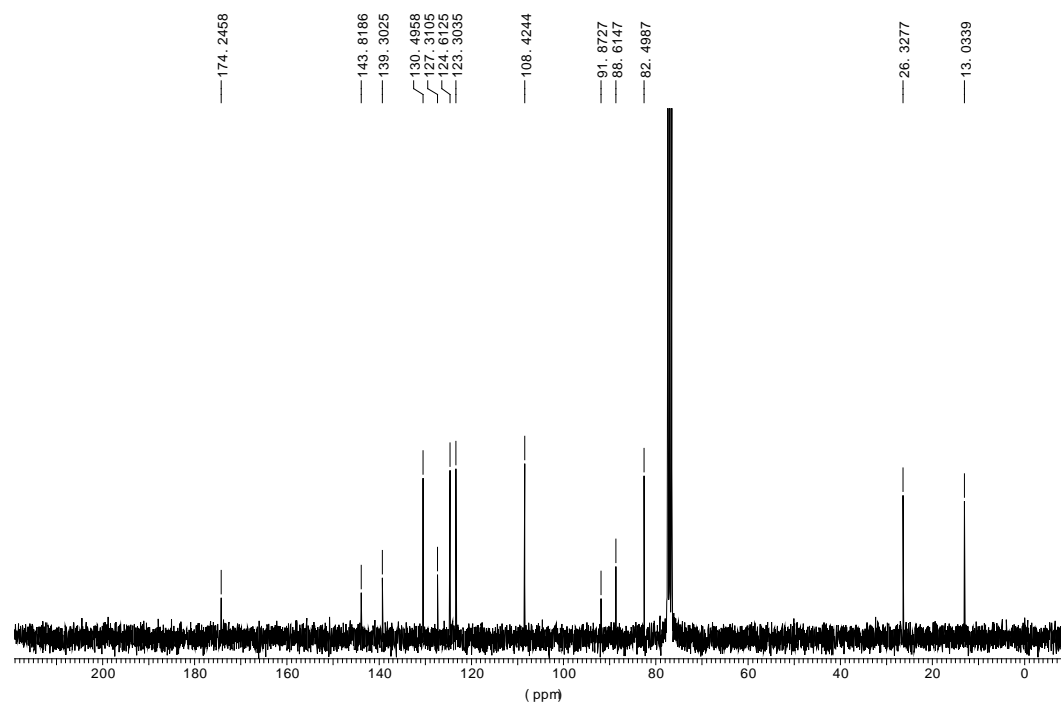

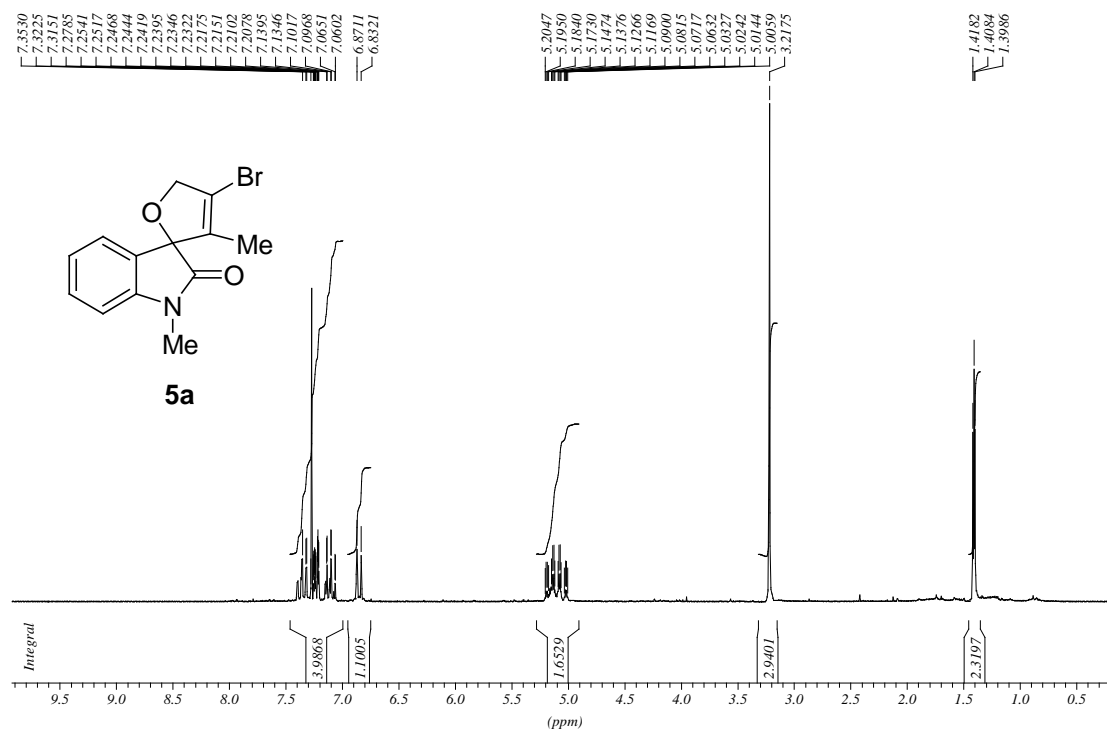

13C - 79C

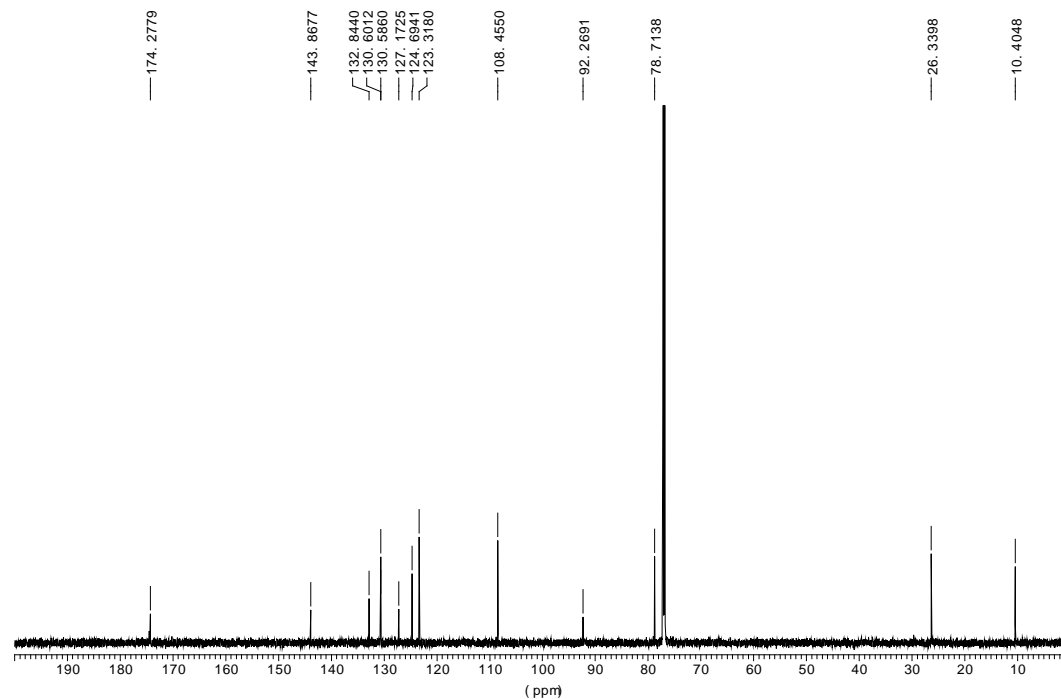

091C888FA

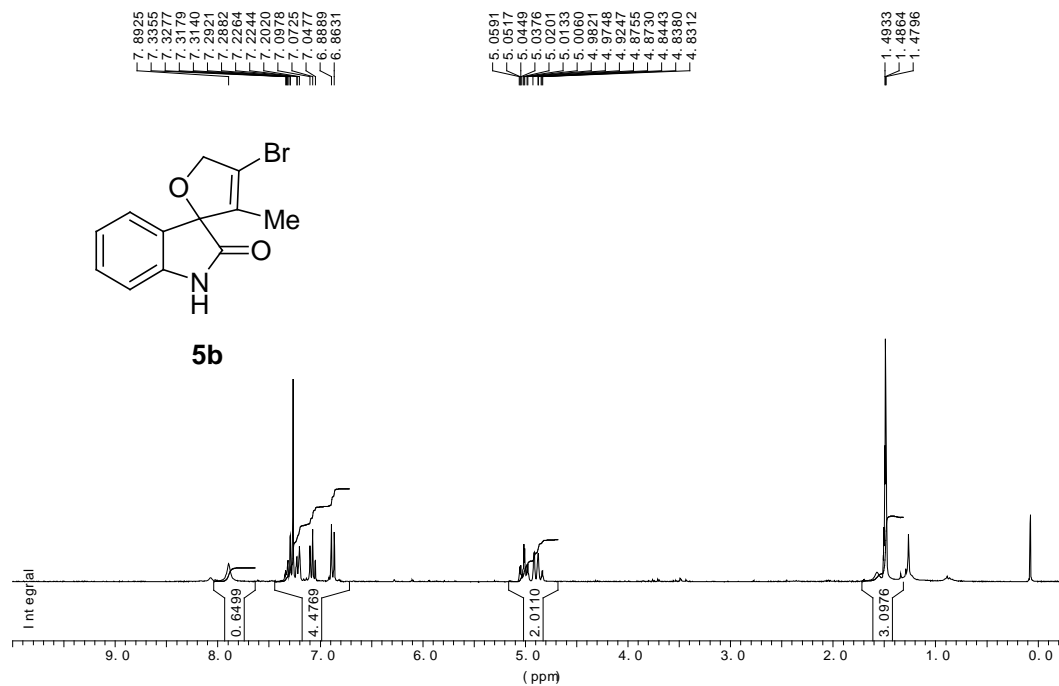

091C824FA

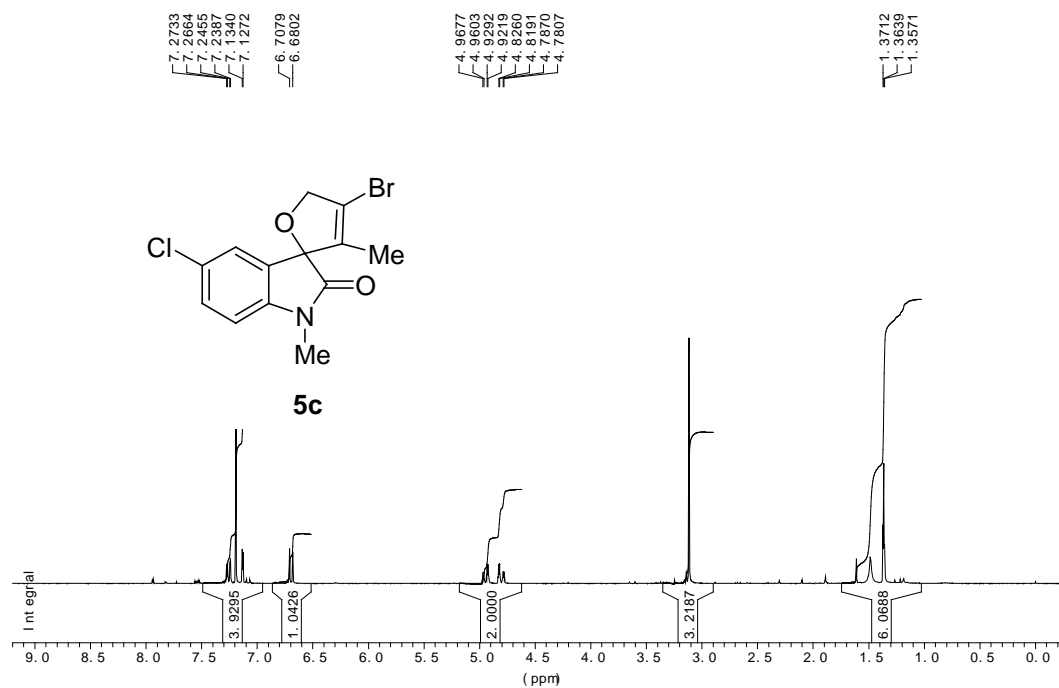

08LC29FA

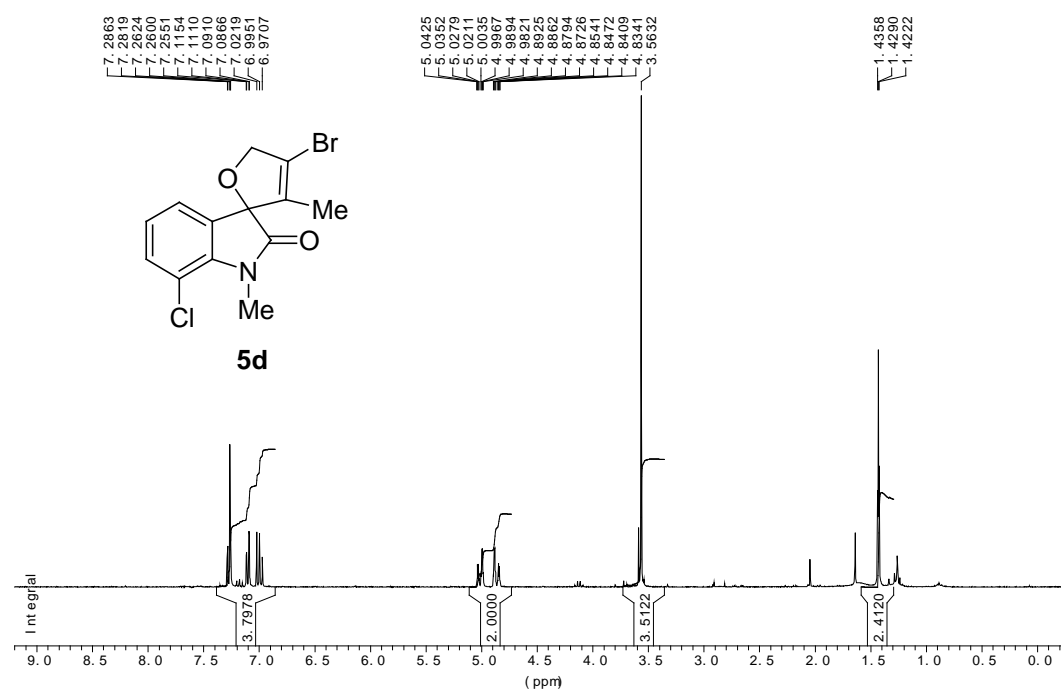

08LC29FB

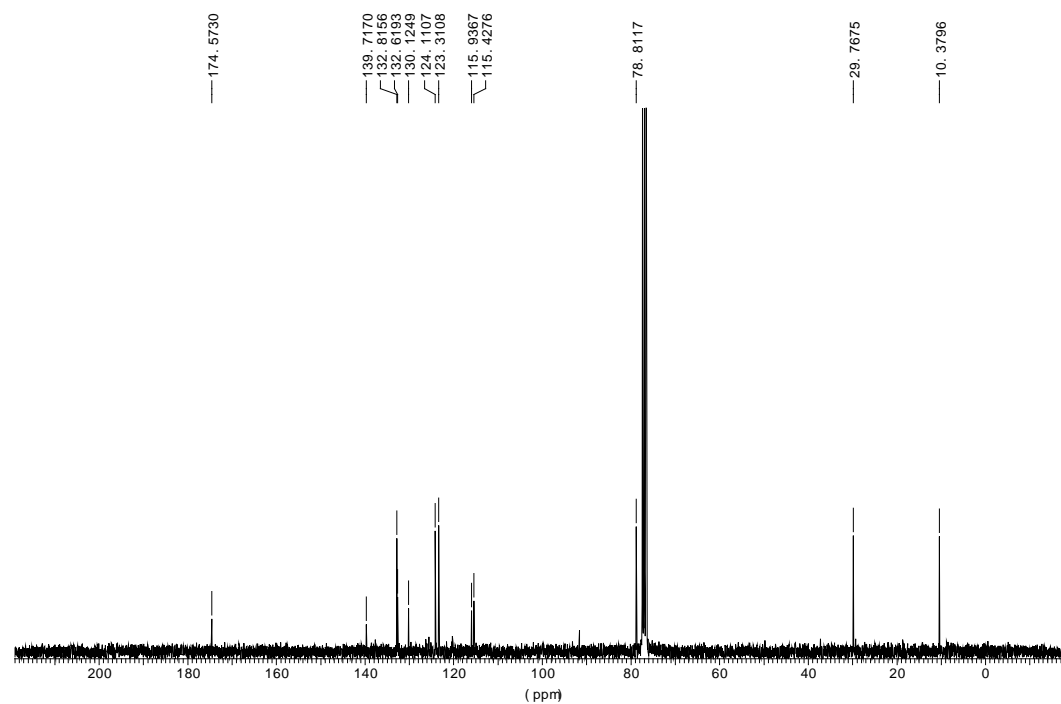



a - 832 a

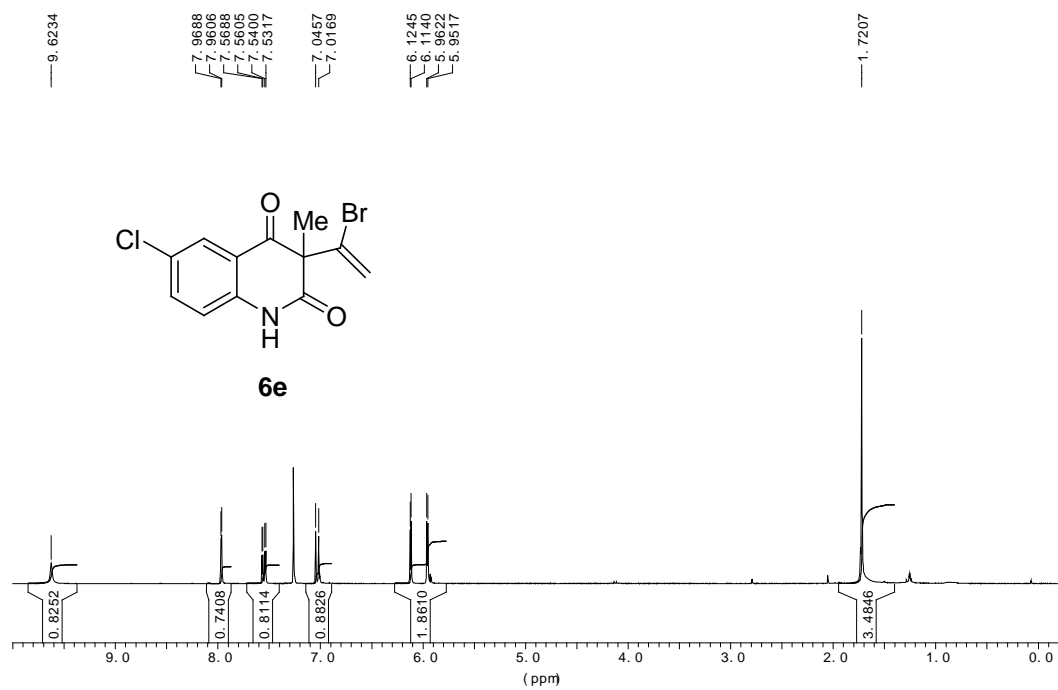

081362 A

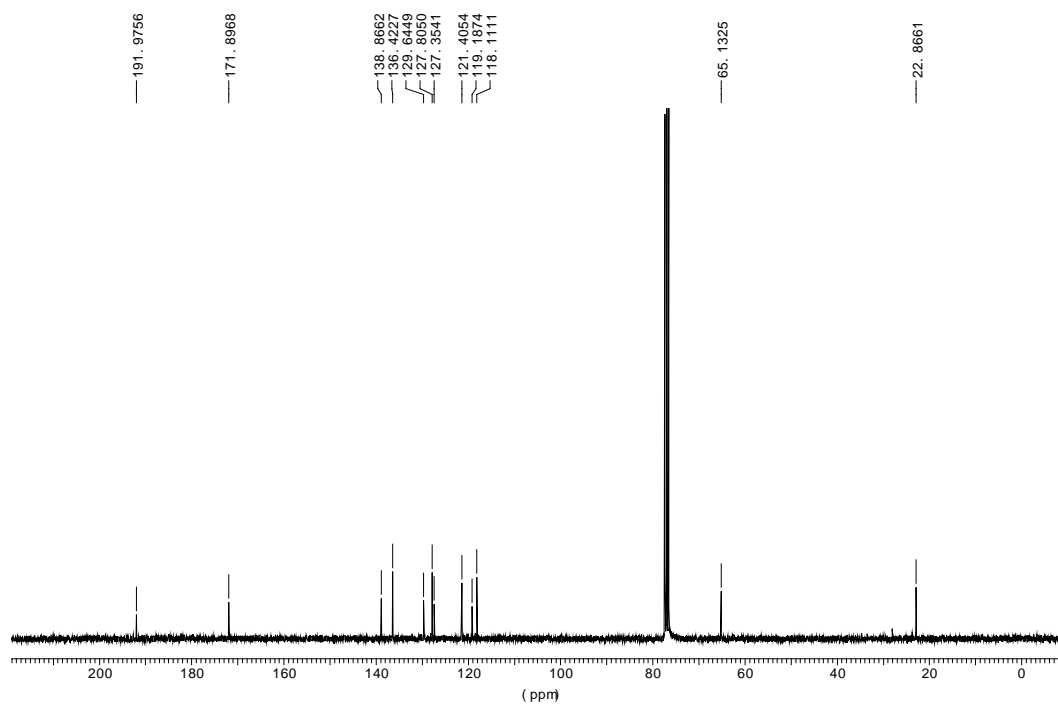

a - ~~88~~ a

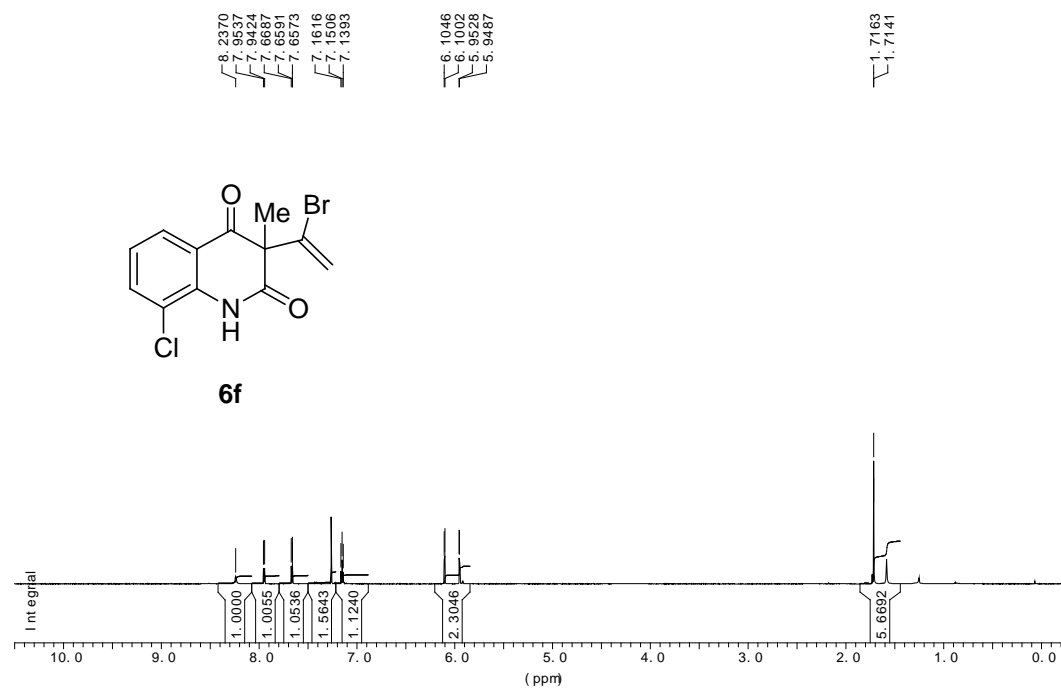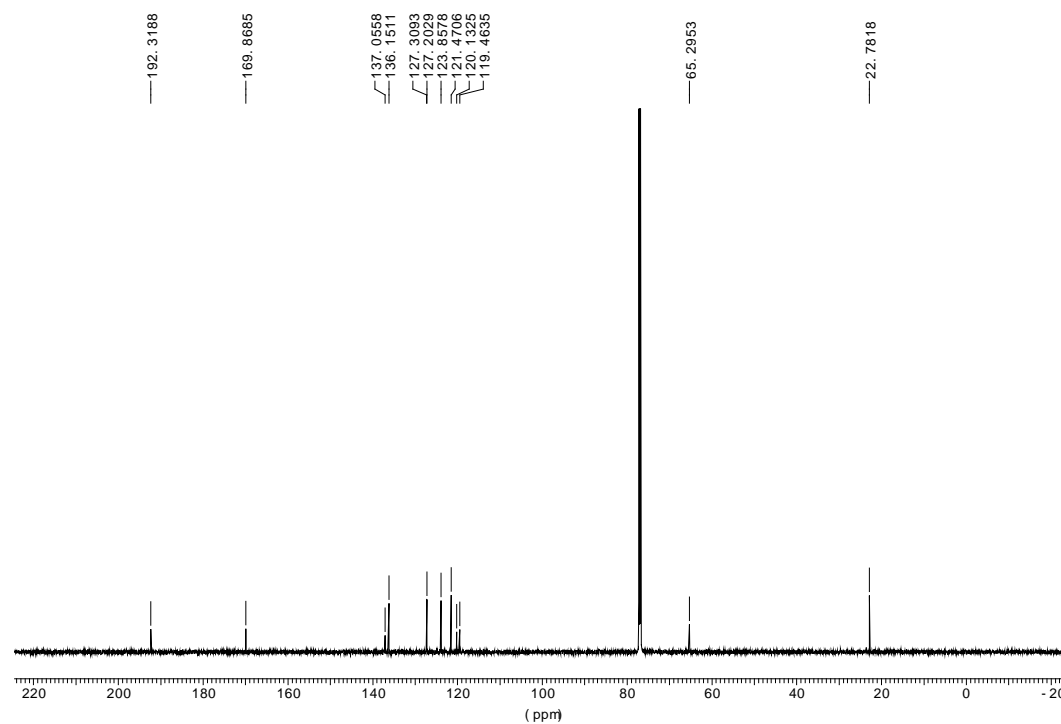

DEL038FC

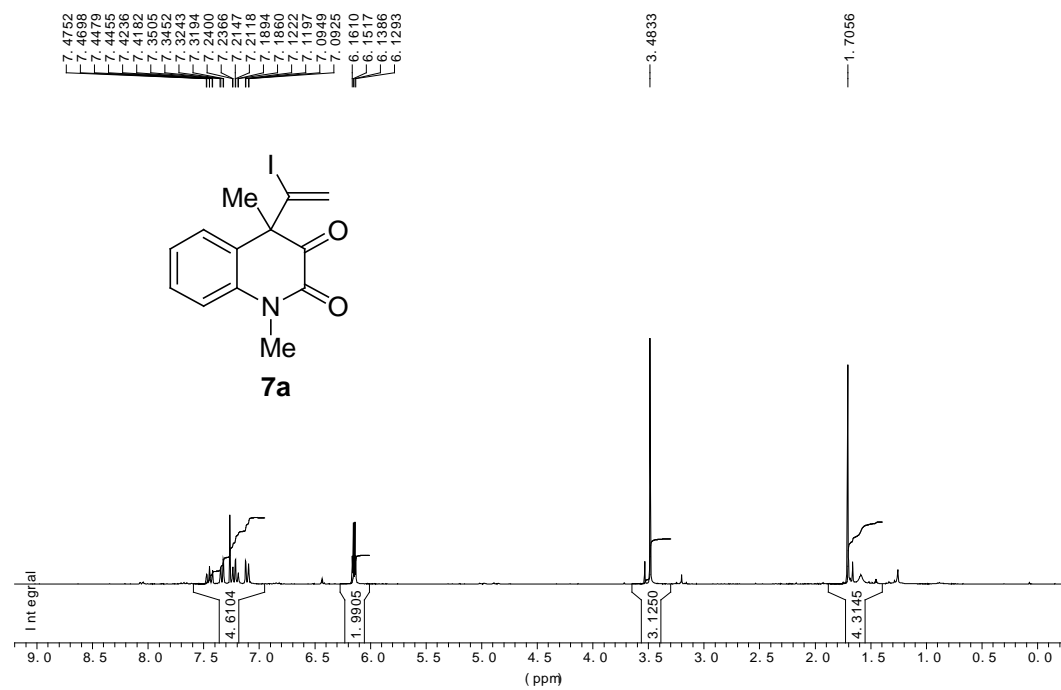

DEL038FC

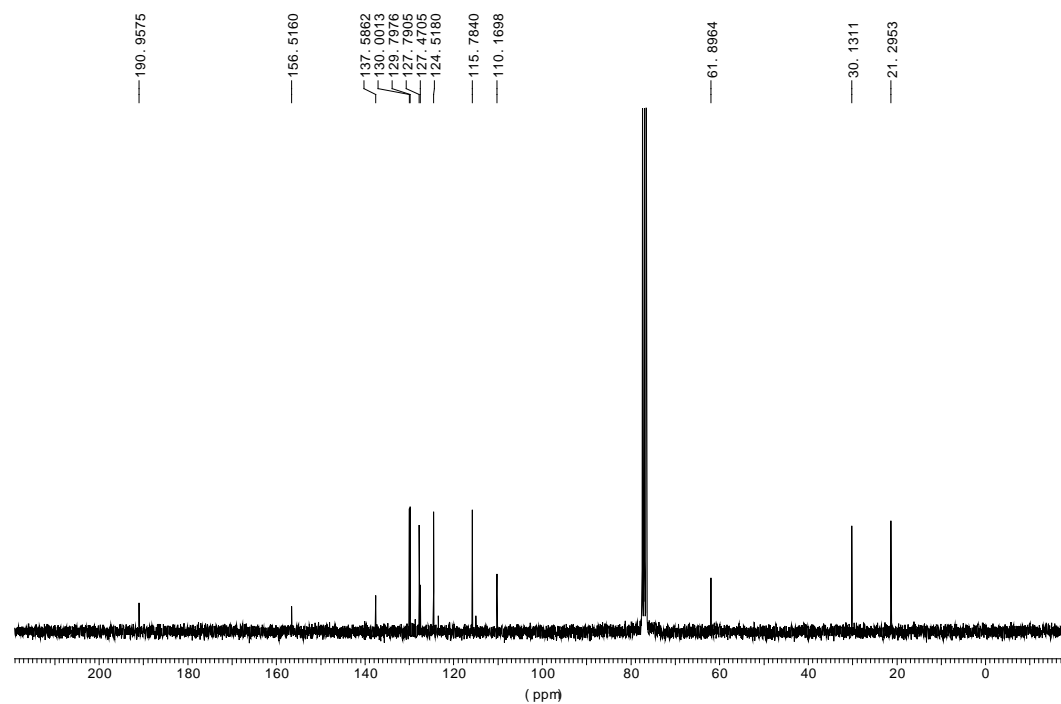

QEN13F2

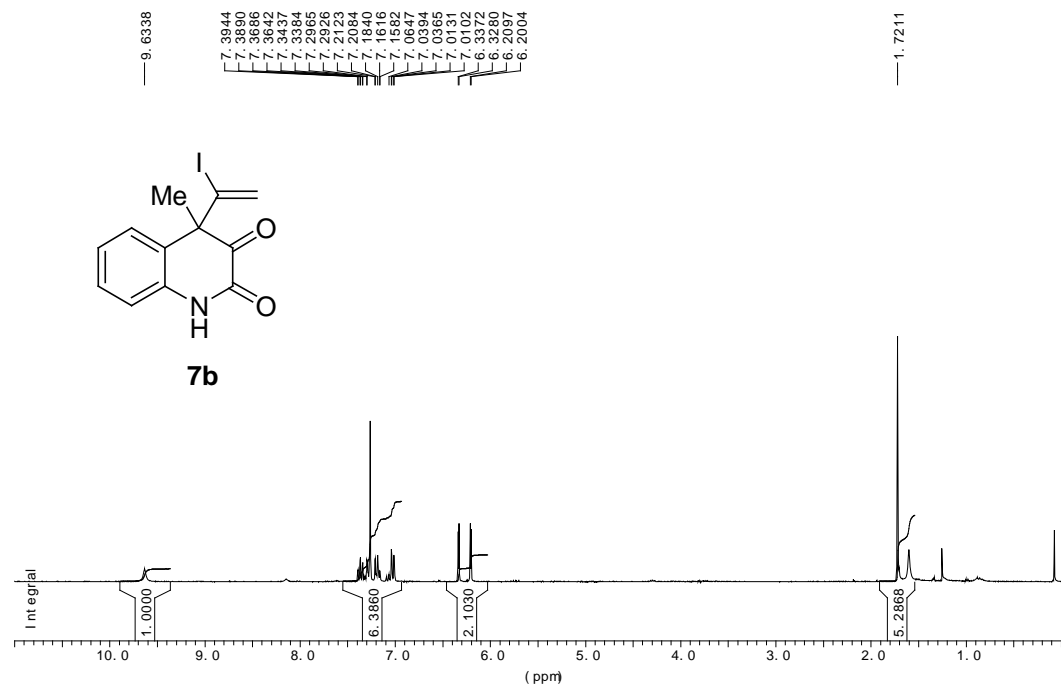

QELC3F2

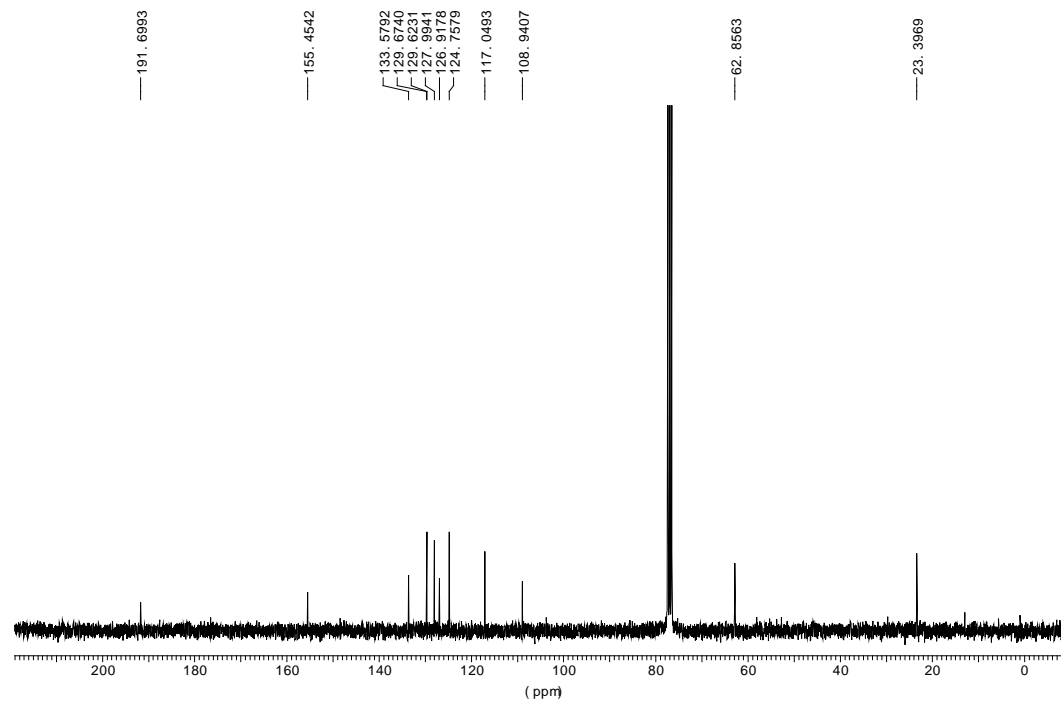

01310

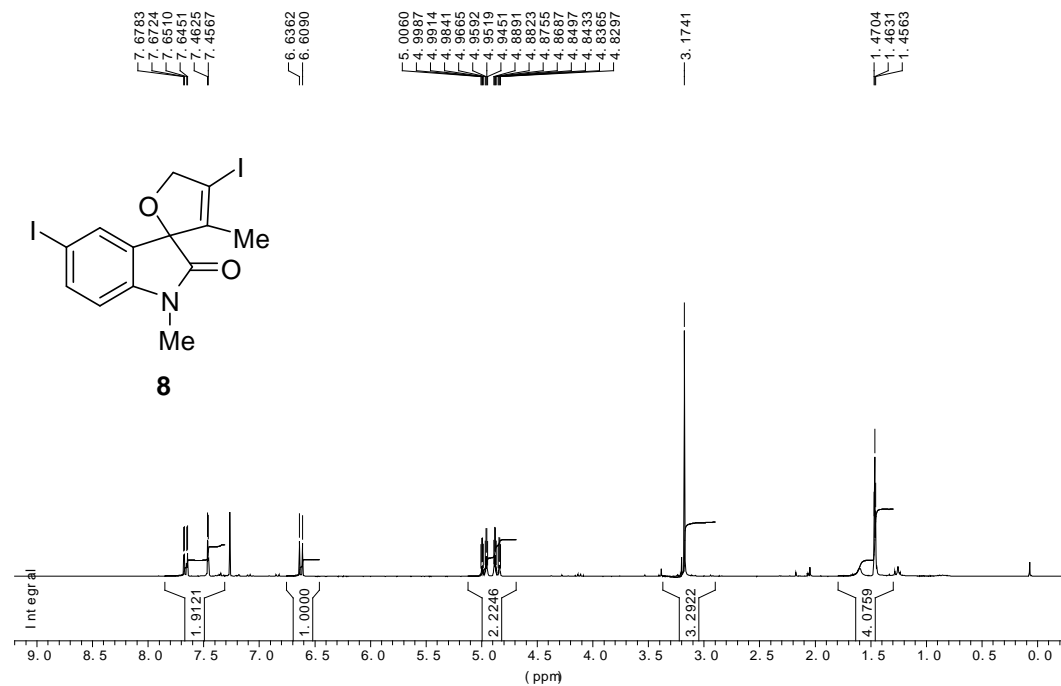

01310

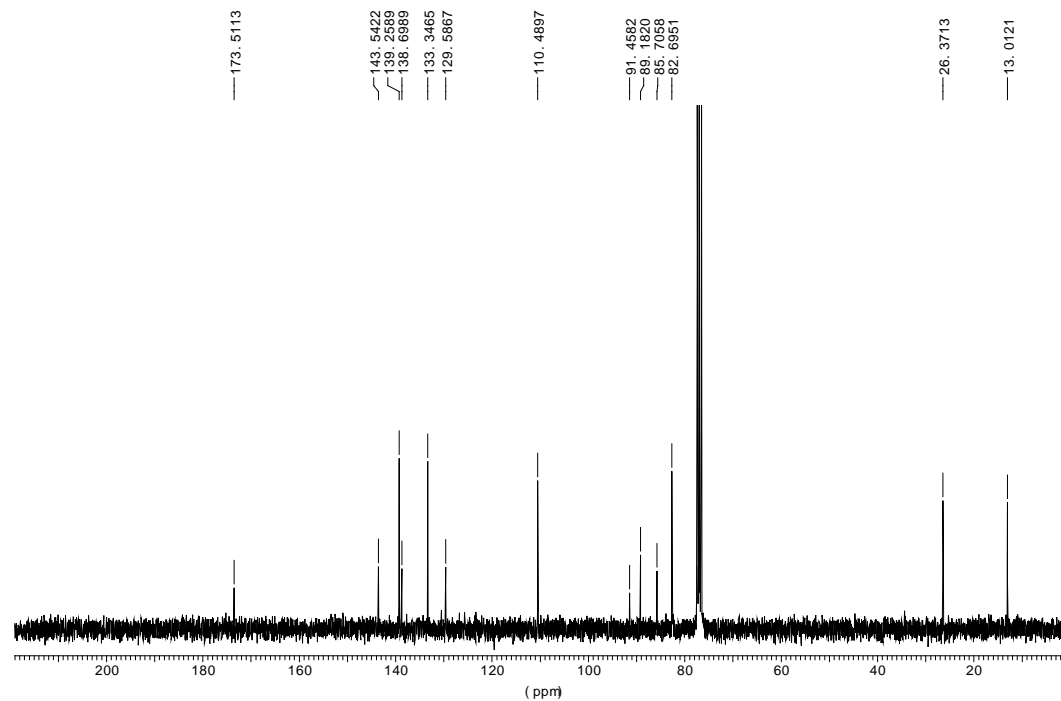

09N12FA

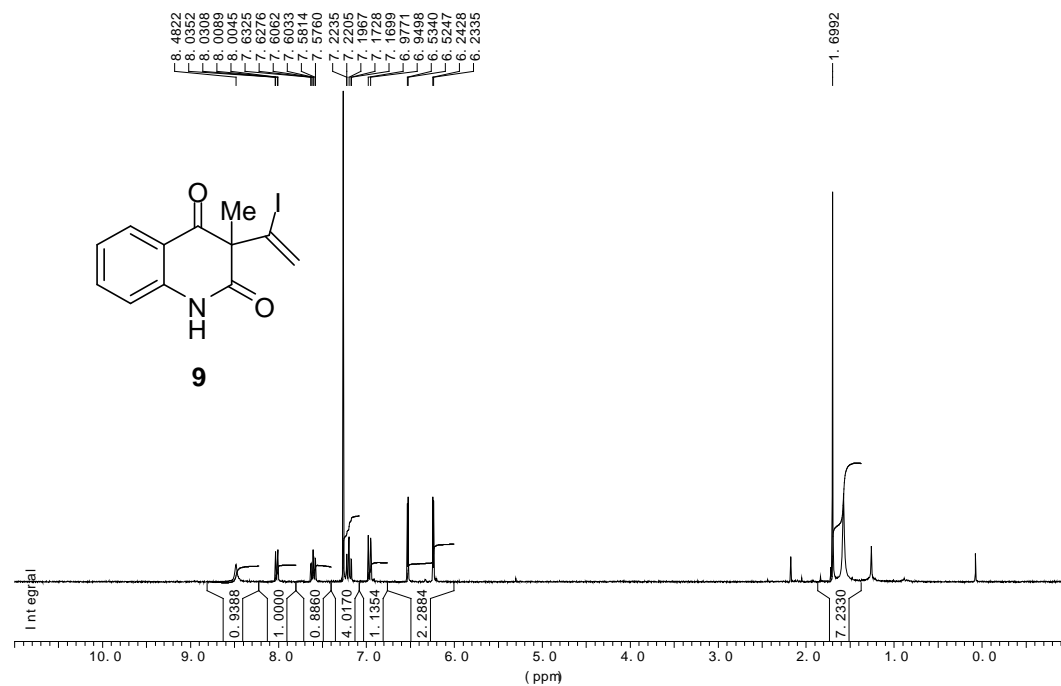

08L03FA

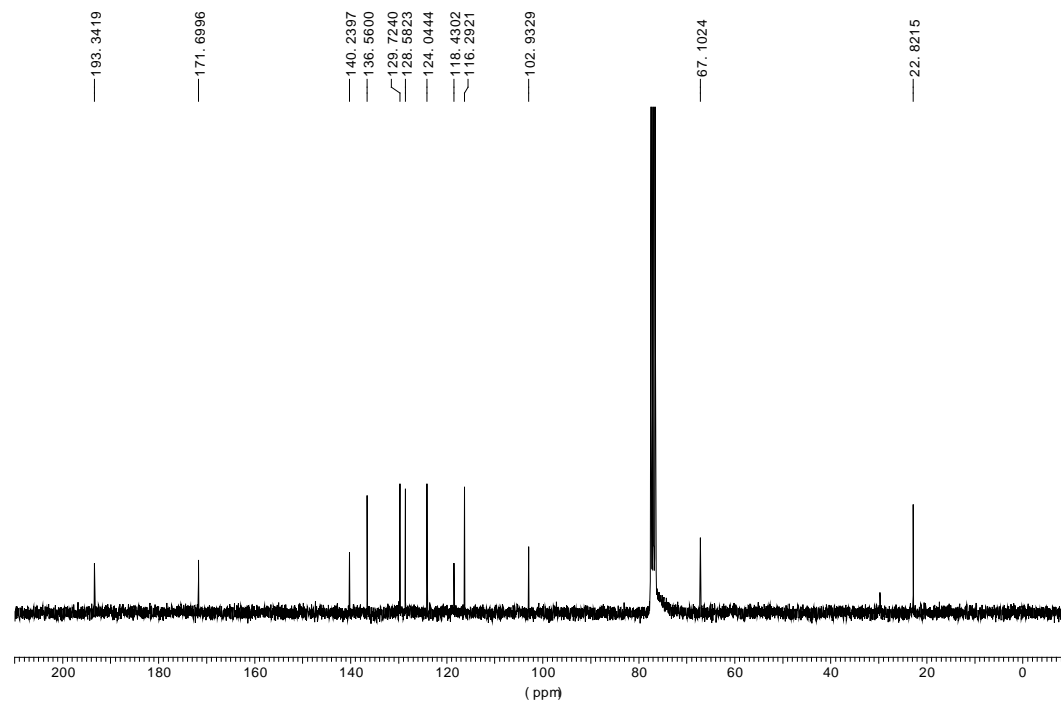

091033FC

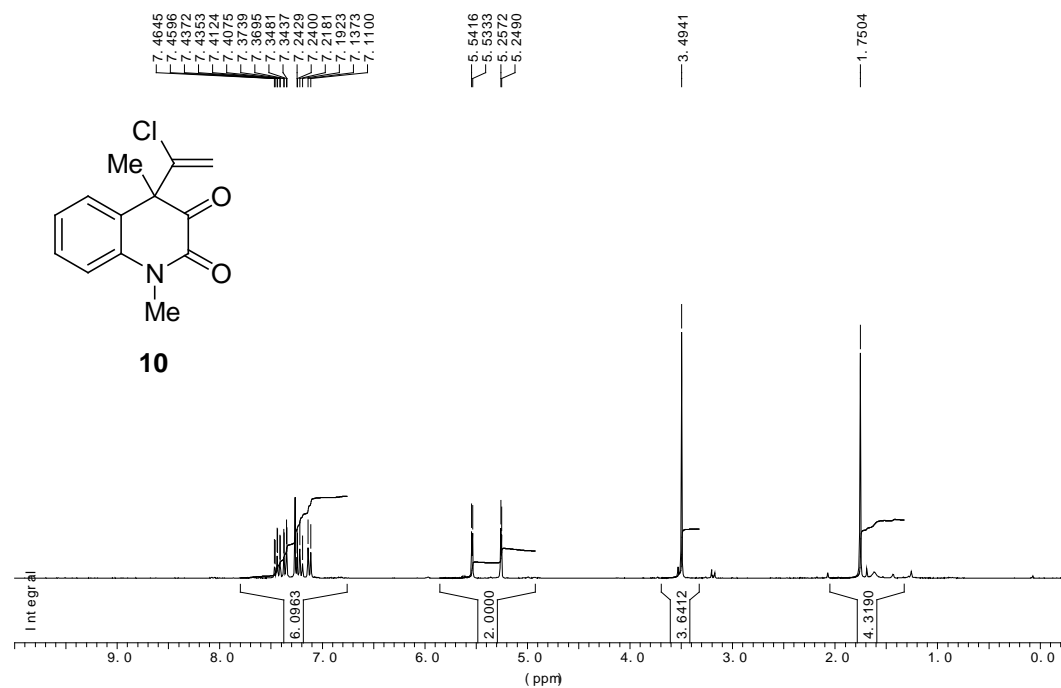

091033FC

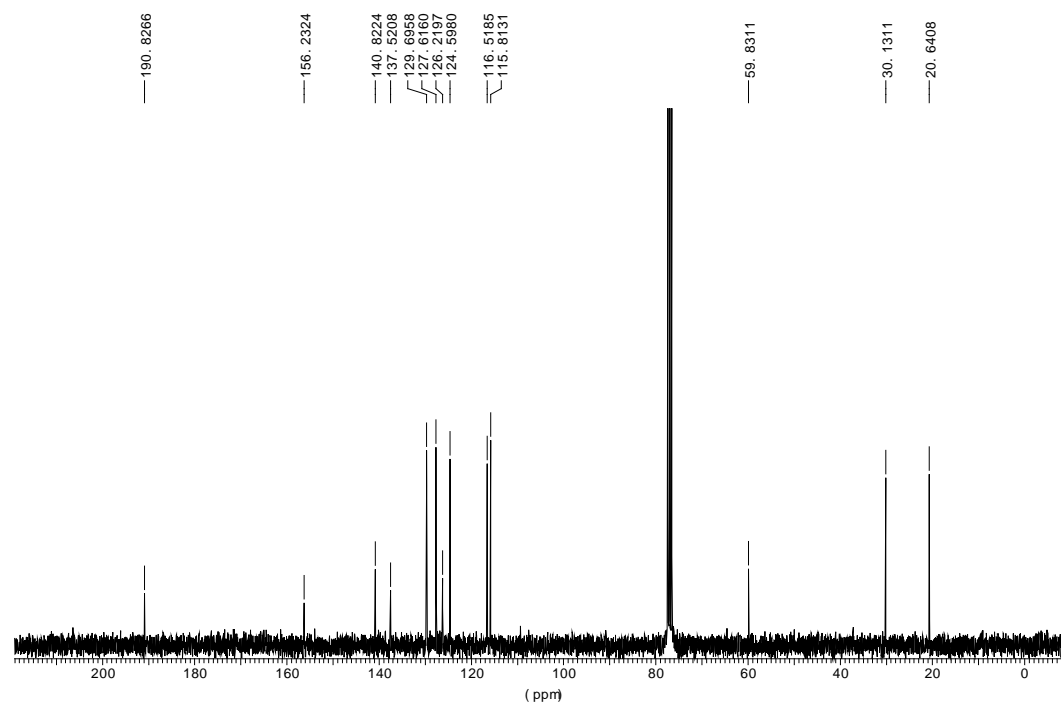

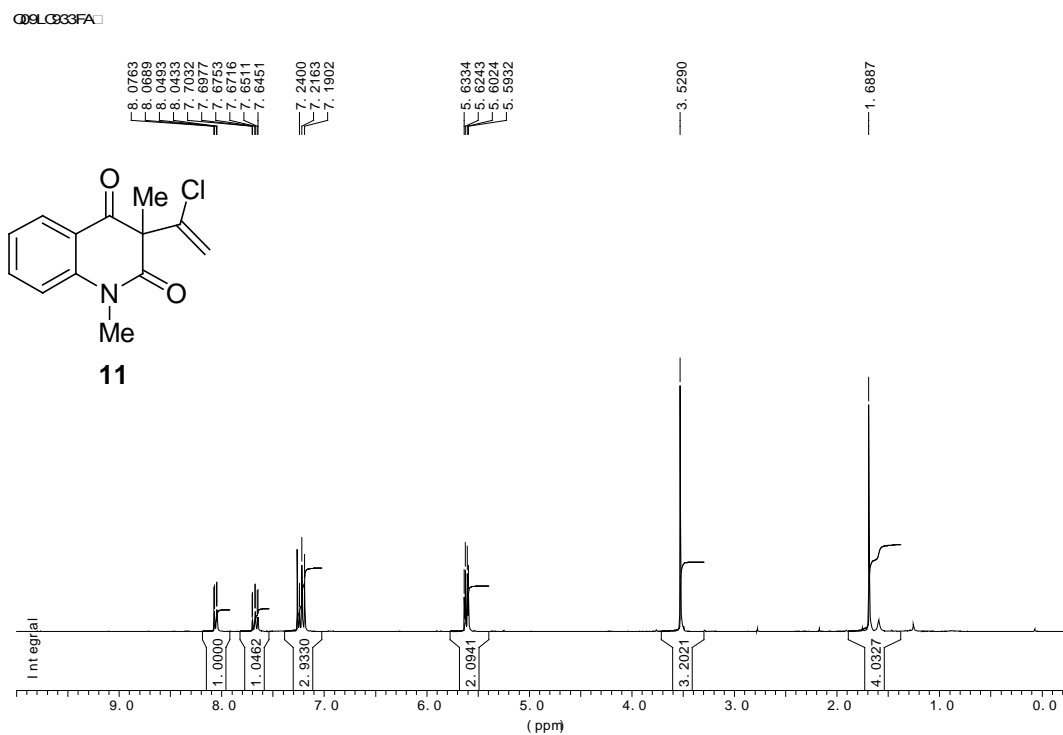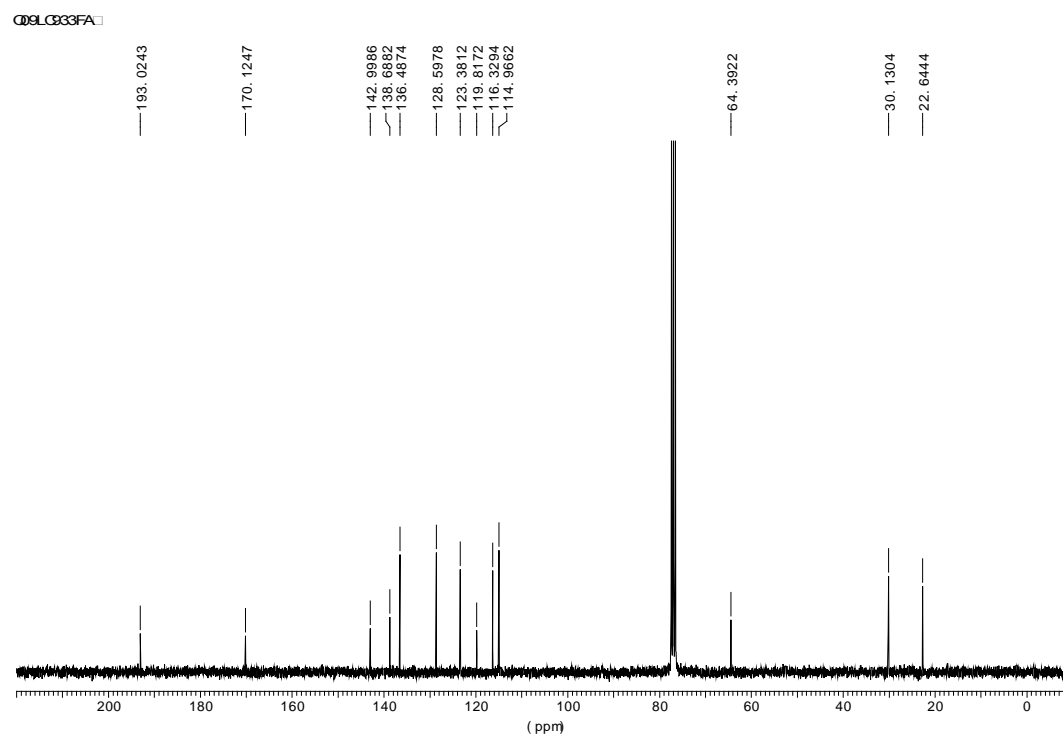



081C340

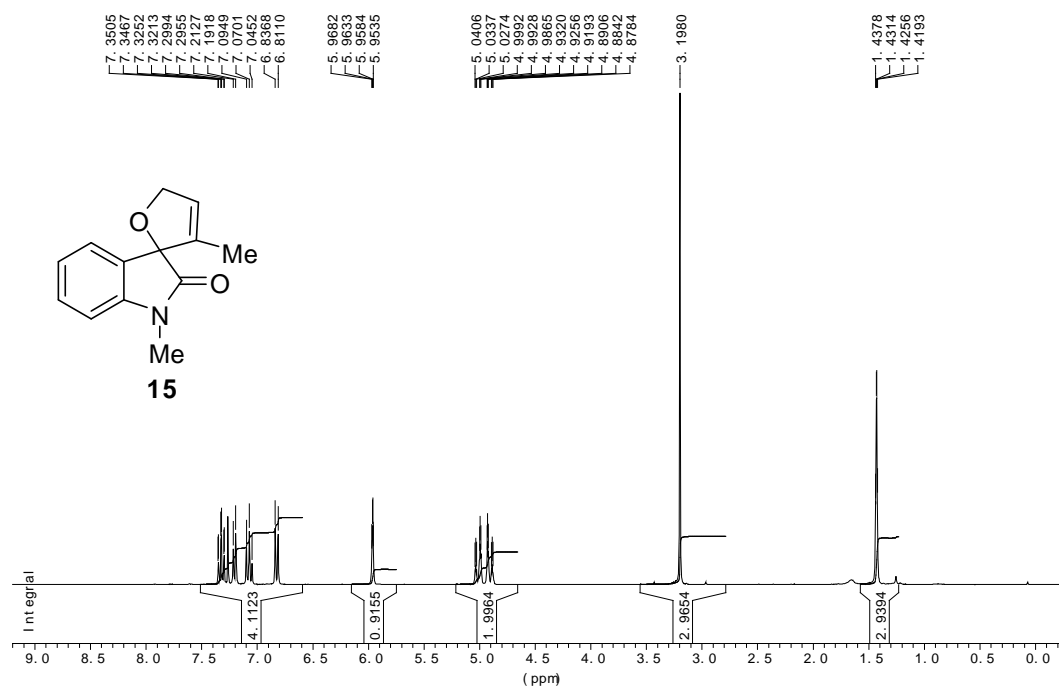

081C340

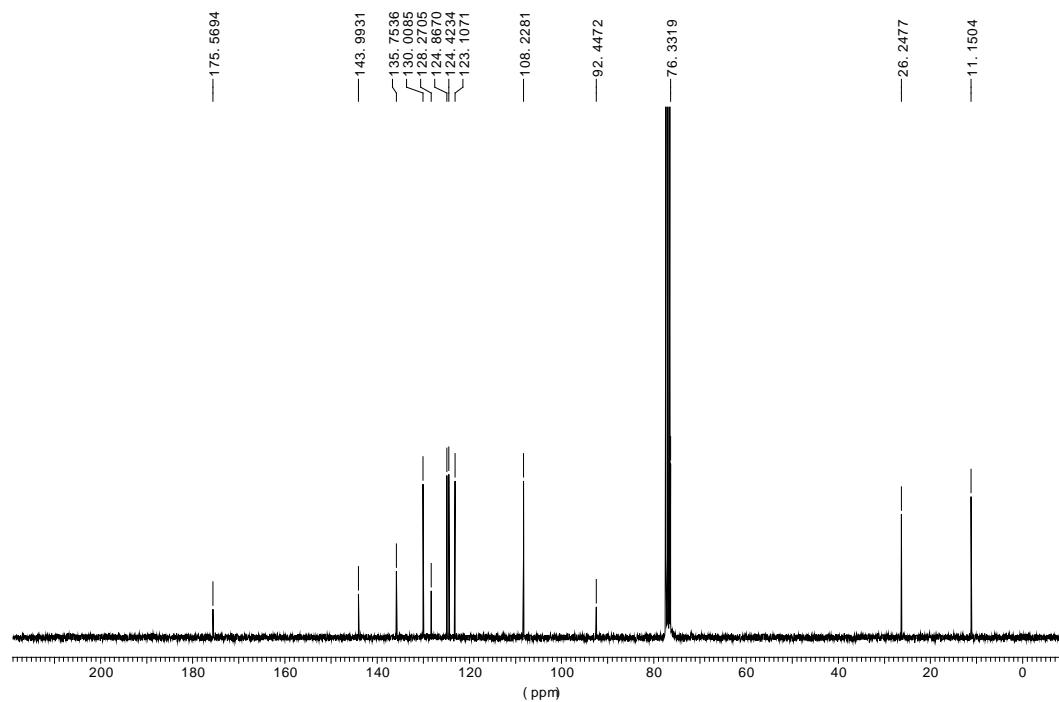

08LC075

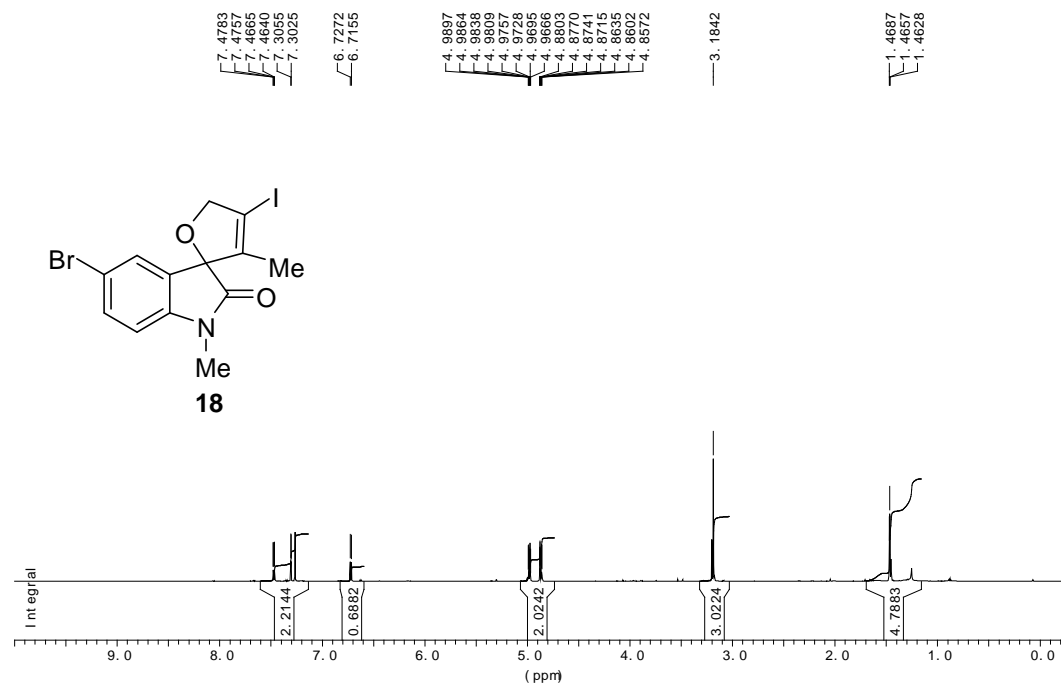

A- 1075

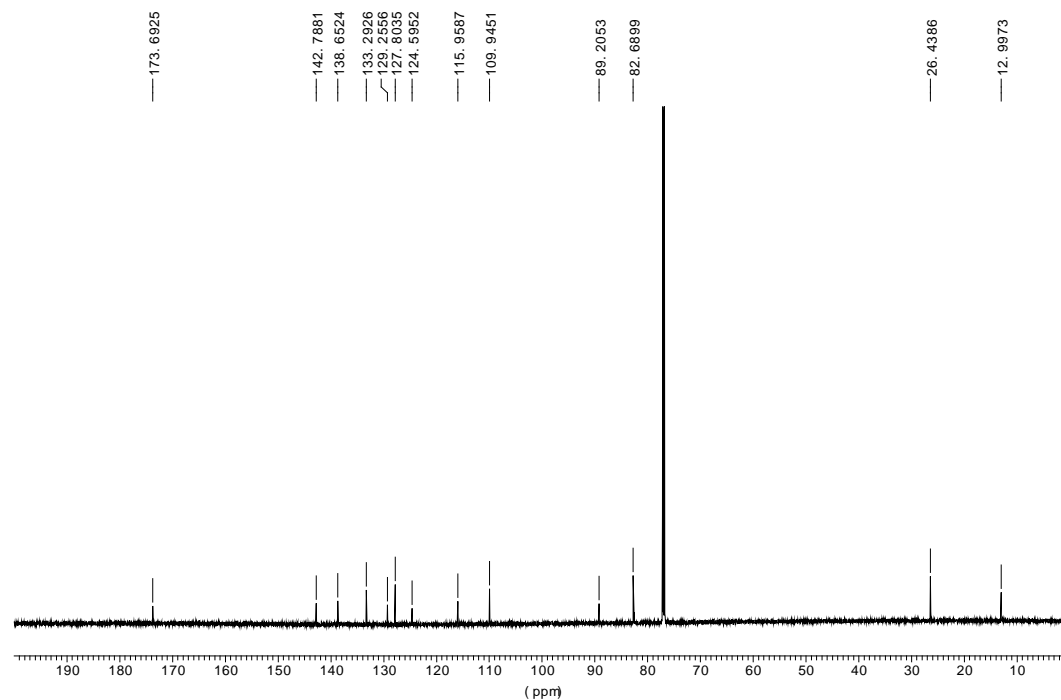

Supplement: c2ob27359d.pdf [file c2ob27359d.pdf]
